# Supplementary material
Source: PubMed Central journal article supplement (PMC2518405)

**Formal Synthesis of (±)-Platensimycin**

**Yefen Zou, Chun-Hsing Chen, Christopher D. Taylor, Bruce M. Foxman and Barry B.**

**Snider\***

Department of Chemistry, MS 015, Brandeis University, Waltham, Massachusetts 02454-9110.

**Supporting Material**

Experimental Procedures .....S2-S10

Molecular Structures of **5** and **9** Established by X-ray Structure Determination ..S11-S12

Copies of <sup>1</sup>H, <sup>13</sup>C and NOESY NMR Spectra .....S13-S40

**General Procedures.** All reactions were performed under nitrogen atmosphere. All commercially available reagents were used without further purification unless otherwise noted. Dichloromethane was distilled from CaH<sub>2</sub> under nitrogen. Ether and tetrahydrofuran were freshly distilled from benzophenone ketyl radical under nitrogen prior to use. Flash chromatography was performed with silica gel (40-63 μm). NMR spectra were recorded in CDCl<sub>3</sub> (unless otherwise noted) on a 400 MHz spectrometer (unless otherwise noted). Chemical shifts are reported in δ and coupling constants (*J* values) in Hz. IR spectra were recorded on an FT-IR spectrometer and are reported in cm<sup>-1</sup>. Allylic oxidation of **13** was carried out in a sealed vessel in a CEM Discover microwave oven with automatic temperature and pressure display.

**(4a*S*,8a*R*)-rel and (4a*R*,8a*R*)-rel-8a-(2-Bromo-2-propenyl)-2,3,4,4a,8,8a-hexahydro-1,5-naphthalenedione (7 and 8).** Ammonia (100 mL) was condensed into an oven dried, three necked flask equipped with dry-ice/acetone condenser at -78 °C under N<sub>2</sub>. A solution of 5-methoxy-1-tetralone (**6**) (1.35 g, 7.66 mmol) in Et<sub>2</sub>O (10 mL) and *t*-BuOH (0.84 mL, 8.81 mmol) was introduced and potassium was added until the reaction mixture maintained a deep blue color for 15 min. To the suspension, anhydrous LiBr (1.46 g, 16.85 mmol) was added and the mixture was stirred vigorously for 30 min. 2,3-Dibromopropene (95%, 0.75 mL, 7.27 mmol) was added and the reaction was stirred at -78 °C for 1 h. The cold bath and condenser were removed and the ammonia was allowed to evaporate over 1 h. The residue was diluted with THF (30 mL) and treated with conc HCl (20 mL) at 0 °C. The mixture was warmed to 25 °C over 30 min and separated into two layers. The aqueous layer was extracted with CH<sub>2</sub>Cl<sub>2</sub>. The combined CH<sub>2</sub>Cl<sub>2</sub> extracts were washed with H<sub>2</sub>O and brine, dried (MgSO<sub>4</sub>), and concentrated to yield 1.9 g of crude product. Flash chromatography on silica gel (9:1 hexanes/EtOAc) gave 0.72 g (35%) of **8** followed by 1.05 g (51%) of **7**.

Data for **7**: <sup>1</sup>H NMR 6.95 (ddd, 1, *J* = 10.0, 4.3, 4.3), 6.04 (d, 1, *J* = 10.0), 5.61 (s, 1), 5.58 (s, 1), 3.18 (d, 1, *J* = 14.7), 2.98 (d, 1, *J* = 14.7), 2.93 (dd, 1, *J* = 4.3, 7.3), 2.86 (dd, 1, *J* = 4.3, 18.9), 2.69 (ddd, 1, *J* = 15.9, 7.3, 7.3), 2.45 (ddd, 1, *J* = 15.9, 6.7, 6.7), 2.25-2.17 (m, 2), 2.04-1.85 (m, 3); <sup>13</sup>C NMR 210.0, 197.5, 147.6, 128.7, 127.4, 122.2, 53.2, 52.3, 46.5, 38.1, 30.9, 23.6, 22.9; IR

(neat) 2947, 2874, 1708, 1668, 1624, 1451, 1424, 1389, 1253, 1211, 1123, 902, 769, 735; HRMS (CI+) Calcd for C<sub>13</sub>H<sub>16</sub>O<sub>2</sub>Br (MH<sup>+</sup>) 283.0334, found 283.0335.

Data for **8**: <sup>1</sup>H NMR 6.89 (ddd, 1, *J* = 10.3, 5.1, 4.0), 6.07 (d, 1, *J* = 10.3), 5.52 (s, 1), 5.48 (s, 1), 3.09 (d, 1, *J* = 15.3), 2.88 (ddd, 1, *J* = 13.5, 13.5, 6.1), 2.82 (d, 1, *J* = 15.3), 2.81 (dd, 1, *J* = 19, 4), 2.78 (dd, 1, *J* = 19, 5), 2.65 (dd, 1, *J* = 11.3, 3.3), 2.43 (br d, 1, *J* = 13.5), 2.23-2.17 (m, 2), 1.82-1.60 (m, 2); <sup>13</sup>C NMR 211.7, 197.5, 146.6, 128.8, 127.3, 121.4, 56.9, 55.1, 40.5, 38.2, 29.9, 25.7, 19.2; IR (neat) 2944, 2870, 1710, 1661, 1626, 1451, 1426, 1389, 1277, 1218, 1152, 901, 753, 735; HRMS (EI+) Calcd for C<sub>13</sub>H<sub>15</sub>O<sub>2</sub><sup>81</sup>Br (M<sup>+</sup>) 284.0235, found 284.0237.

**Acidic Equilibration of 7 and 8.** A solution of **8** (0.72 g, 2.54 mmol) in THF (20 mL) was treated with conc HCl (10 mL) at 0 °C. The mixture was warmed to 25 °C over 30 min and separated into two layers. The aqueous layer was extracted with CH<sub>2</sub>Cl<sub>2</sub>. The combined CH<sub>2</sub>Cl<sub>2</sub> extracts were washed with brine, dried (MgSO<sub>4</sub>), and concentrated to yield 0.7 g of crude product. Flash chromatography on silica gel (9:1 hexanes/EtOAc) gave 0.29 g (40%) of **8** and 0.40 g (55%) of **7**. An identical mixture of products was obtained by equilibration of **7**.

**(4a*R*,7*S*,9a*S*)-rel-Octahydro-6-methylene-4a,7-methano-4a*H*-benzocycloheptene-4,9-dione (5).** A solution of **7** (1.0 g, 3.53 mmol), *n*-Bu<sub>3</sub>SnH (2.16 mL, 7.76 mmol), and AIBN (50 mg) in benzene (60 mL) was degassed using the freeze-pump-thaw technique (3 cycles) and heated under reflux for 3 h. The reaction was cooled down to 25 °C and the solvent was evaporated. The residue was diluted with Et<sub>2</sub>O (20 mL) and treated with aqueous KF solution (10%, 15 mL).<sup>14</sup> The resulting suspension was stirred vigorously at 25 °C overnight. The layers were separated and the aqueous layer was extracted with Et<sub>2</sub>O. The combined Et<sub>2</sub>O extracts were washed with brine, dried (MgSO<sub>4</sub>), and concentrated to yield 1.2 g of crude product. Flash chromatography on silica gel (10:1 hexanes/EtOAc) gave 604 mg (84%) of **5**: mp 63-64 °C; <sup>1</sup>H NMR (CDCl<sub>3</sub>) 5.01 (s, 1), 4.96 (s, 1), 3.24 (d, 1, *J* = 17.7), 3.05-3.02 (br, 1), 2.67 (dd, 1, *J* = 16.5, 3.7), 2.57-2.40 (m, 5), 2.19-2.11 (m, 2), 1.99 (dddd, 1, *J* = 12.8, 12.8, 12.8, 3.7), 1.88-1.81 (m, 1), 1.80-1.73 (m, 2); (400 and 800 MHz, C<sub>6</sub>D<sub>6</sub>) 4.81 (s, 2), 3.45 (d, 1, *J* = 17.6), 2.40 (br, 1), 2.25 (d, 1, *J* = 12.8), 2.21 (d, 1, *J* = 16.0), 2.09 (d, 1, *J* = 16.0), 2.08 (d, 1, *J* = 14.2), 2.00 (d, 1, *J* = 17.6),

1.88 (ddd, 1,  $J = 14.2, 14.2, 6.1$ ), 1.58 (d, 1,  $J = 12.2$ ), 1.45-1.38 (m, 2), 1.24 (dddd, 1,  $J = 13.1, 13.1, 13.1, 2.1$ ), 1.17-1.10 (m, 2);  $^{13}\text{C}$  NMR 210.3, 210.0, 150.1, 108.9, 59.8, 56.9, 48.8, 42.6, 39.1, 38.7, 37.4, 26.9, 25.8; IR (neat) 2941, 2874, 1743, 1706, 1660, 1447, 1330, 1220, 1147, 1130, 1006, 884; HRMS (CI<sup>+</sup>) Calcd for  $\text{C}_{13}\text{H}_{16}\text{O}_2$  ( $\text{M}^+$ ) 204.1150, found 204.1150.

The protons were much better resolved in  $\text{C}_6\text{D}_6$  and were fully assigned from a COSY spectrum as shown below. A 2D NOESY spectrum at 800 MHz showed NOEs from the proton at  $\delta$  2.25 to the proton at  $\delta$  2.00.

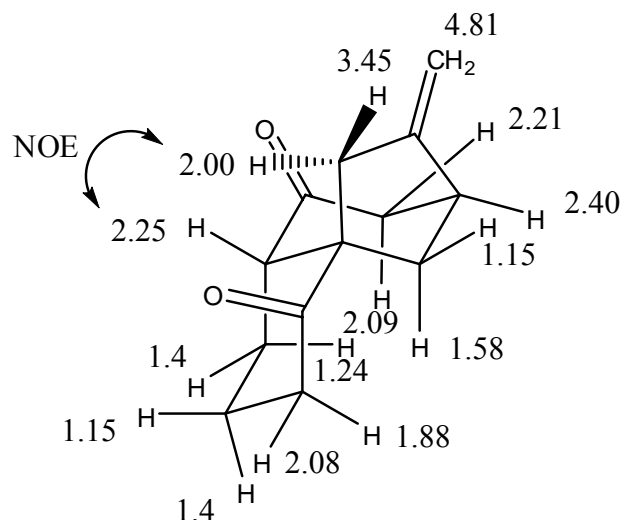

**(4aR,7S,9aR)-rel-Octahydro-6-methylene-4a,7-methano-4aH-benzocycloheptene-4,9-dione (9).** A solution of **8** (0.5 g, 1.77 mmol),  $n\text{-Bu}_3\text{SnH}$  (1.08 mL, 3.86 mmol), and AIBN (25mg) in benzene (30 mL) was degassed using the freeze-pump-thaw technique (3 cycles) and heated under reflux for 3 h. The reaction was cooled down to 25 °C and the solvent was evaporated. The residue was diluted with  $\text{Et}_2\text{O}$  (10 mL) and treated with aqueous KF solution (10%, 8 mL).<sup>14</sup> The resulting suspension was stirred vigorously at 25 °C overnight. The layers were separated and the aqueous layer was extracted with  $\text{Et}_2\text{O}$ . The combined  $\text{Et}_2\text{O}$  extracts were washed with brine, dried ( $\text{MgSO}_4$ ), and concentrated to yield 0.6 g of crude product. Flash chromatography on silica gel (7:1 hexanes/ $\text{EtOAc}$ ) gave 292 mg (81%) of **9**: mp 81-82 °C;  $^1\text{H}$  NMR 4.99 (s, 1), 4.86 (s, 1), 3.05-3.02 (br, 1), 2.70 (d, 1,  $J = 17.1$ ), 2.56-2.52 (m, 3), 2.41-2.37 (m, 2), 2.29 (ddd, 1,  $J = 13.4, 13.4, 5.5$ ), 2.22-2.08 (m, 3), 1.87 (d, 1,  $J = 12.2$ ), 1.77-1.56 (m, 2);

$^{13}\text{C}$  NMR 211.1, 208.6, 149.8, 108.4, 58.9, 58.0, 50.0, 42.1, 39.6, 38.6, 37.4, 24.2, 21.4; IR (neat) 2952, 2865, 1709, 1662, 1452, 1342, 1259, 1200, 1180, 886; HRMS (CI+) Calcd for  $\text{C}_{13}\text{H}_{16}\text{O}_2$  ( $\text{M}^+$ ) 204.1150, found 204.1154.

**Basic Equilibration of 5 and 9.** Tricyclic Dione **5** (35 mg, 0.17 mmol) was dissolved in 10% KOH in MeOH (5 mL) at 25 °C. The solution was stirred at 25 °C for 5 h and quenched with saturated  $\text{NH}_4\text{Cl}$  solution. The aqueous layer was extracted with  $\text{CH}_2\text{Cl}_2$ . The combined  $\text{CH}_2\text{Cl}_2$  extracts were washed with  $\text{H}_2\text{O}$  and brine, dried ( $\text{MgSO}_4$ ), and concentrated to yield 38 mg of crude product. Flash chromatography on silica gel (10:1 hexanes/EtOAc) gave 7 mg (20%) of **5** followed by 27 mg (78%) of **9**. An identical mixture of products was obtained by equilibration of **9**.

**(1S,3S,4S,5aR,6S,9aS)-rel- and (1S,3S,4S,5aR,6R,9aS)-rel-1,4,5,6,7,8,9,9a-Octahydro-3-methyl-3H-1,4:3,5a-dimethano-2-benzoxepin-6-ol (3 and 12).** A solution of tricyclic dione **5** (80 mg, 0.39 mmol) in THF (10 mL) was treated with L-Selectride (1 M in THF, 1.6 mL, 1.6 mmol) at -78 °C. The cold bath was removed and the reaction mixture was stirred for 2 h. The reaction was quenched with 3 M NaOH (1 mL) and 30%  $\text{H}_2\text{O}_2$  (1 mL). The resulting mixture was stirred vigorously at 25 °C overnight. The layers were separated and the aqueous layer was extracted with  $\text{CH}_2\text{Cl}_2$ . The combined  $\text{CH}_2\text{Cl}_2$  extracts were washed with  $\text{H}_2\text{O}$  and brine, dried ( $\text{MgSO}_4$ ), and concentrated to yield 78 mg (95%, about 95% pure) of a mixture of diols **4** and **11**.

A mixture of crude diols **4** and **11** (78 mg),  $\text{CH}_2\text{Cl}_2$  (2 mL), and TFA (3 mL) was stirred at 0 °C for 2 h and concentrated under reduced pressure at 0 °C. The residue was dissolved in MeOH (15 mL) and the resulting solution was treated with  $\text{K}_2\text{CO}_3$  (30 mg) at 25 °C. The reaction mixture was stirred for 30 min and  $\text{H}_2\text{O}$  (5 mL) and  $\text{CH}_2\text{Cl}_2$  (20 mL) were added. The layers were separated and the aqueous layer was extracted with  $\text{CH}_2\text{Cl}_2$ . The combined  $\text{CH}_2\text{Cl}_2$  extracts were washed with brine, dried ( $\text{MgSO}_4$ ), and concentrated to yield 72 mg of crude product. Flash chromatography on MeOH-deactivated silica gel (9:1 hexanes/EtOAc) gave 30 mg (42%) of **12** followed by 27 mg (39%) of **3**.

Data for **3**:  $^1\text{H}$  NMR 4.10 (dd, 1,  $J = 3.4, 3.4$ ), 3.42-3.41 (m, 1), 2.22 (dd, 1,  $J = 6.7, 6.7$ ),

2.12 (ddd, 1,  $J = 12.8, 3.7, 3.7$ ), 1.97 (dd, 1,  $J = 11.0, 3.1$ ), 1.90 (d, 1,  $J = 11.6$ ), 1.83-1.55 (m, 6), 1.46 (br d, 1,  $J = 12.2$ ), 1.39 (s, 3), 1.33-1.23 (m, 3);  $^{13}\text{C}$  NMR 86.1, 80.2, 73.7, 50.0, 49.3, 45.5, 40.2, 39.4, 38.2, 30.2, 25.2, 23.3, 19.9; IR (neat) 3442, 2936, 2864, 1474, 1448, 1378, 1153, 1035, 820; HRMS (EI+) Calcd for  $\text{C}_{13}\text{H}_{20}\text{O}_2$  ( $\text{M}^+$ ) 208.1463, found 208.1460.

Data for **12**:  $^1\text{H}$  NMR 4.10 (dd, 1,  $J = 3.4, 3.4$ ), 3.51-3.46 (m, 1), 2.24-2.20 (m, 1), 1.90-1.78 (m, 5), 1.70-1.54 (m, 4), 1.41-1.20 (m, 4), 1.38 (s, 3);  $^{13}\text{C}$  NMR 85.4, 79.8, 72.5, 50.0, 48.5, 44.8, 44.3, 38.4, 33.3, 32.1, 25.0, 24.0, 23.4; IR (neat) 3426, 2932, 2860, 1704, 1448, 1378, 1060, 940, 820; HRMS (EI+) Calcd for  $\text{C}_{13}\text{H}_{20}\text{O}_2$  ( $\text{M}^+$ ) 208.1463, found 208.1460.

**(1S,3S,4S,5aS,9aS)-rel-1,4,5,8,9,9a-Hexahydro-3-methyl-3H-1,4:3,5a-dimethano-2-benzoxepine (13)**. To a solution of **3** (25 mg, 0.12 mmol) and pyridine (0.8 mL) in  $\text{CH}_2\text{Cl}_2$  (8 mL) at  $-78\text{ }^\circ\text{C}$  was added  $\text{Tf}_2\text{O}$  (0.14 mL, 0.48 mmol). The cold bath was removed. The reaction mixture was warmed to  $-5\text{ }^\circ\text{C}$  over 15 min and treated with isopropanol (0.07 mL, 0.48 mmol) to quench the excess  $\text{Tf}_2\text{O}$ . The resulting solution was stirred at  $25\text{ }^\circ\text{C}$  for 15 min and quenched with saturated  $\text{NaHCO}_3$  solution. The layers were separated and the aqueous layer was extracted with  $\text{Et}_2\text{O}$ . The combined  $\text{Et}_2\text{O}$  extracts were washed with saturated  $\text{CuSO}_4$  solution,  $\text{H}_2\text{O}$ , and brine, dried ( $\text{MgSO}_4$ ), and concentrated to yield 30 mg of crude product. Flash chromatography on silica gel (99:1 hexanes/ $\text{EtOAc}$ ) gave 20 mg (90%) of **13**:  $^1\text{H}$  NMR 5.60 (ddd, 1,  $J = 9.8, 3.7, 3.7$ ), 5.33 (d, 1,  $J = 9.8$ ), 4.14 (dd, 1,  $J = 3.4, 3.4$ ), 2.16-2.09 (m, 3), 1.90-1.72 (m, 4), 1.58-1.42 (m, 5), 1.39 (s, 3);  $^{13}\text{C}$  NMR 133.2, 126.8, 86.7, 80.6, 52.7, 45.6, 44.9, 44.6, 43.5, 38.3, 26.2, 23.3, 22.2; IR (neat) 2941, 2865, 1709, 1473, 1447, 1377, 1326, 1090, 1040, 997, 823; HRMS (CI+) Calcd for  $\text{C}_{13}\text{H}_{18}\text{O}$  ( $\text{M}^+$ ) 190.1358, found 190.1356.

**(4R,4aR,7S,9aS)-rel-Octahydro-4-hydroxy-6-methylene-4a,7-methano-4aH-benzocyclohepten-9-one (10)**. A solution of **5** (480 mg, 2.35 mmol) in  $\text{EtOH}$  (20 mL) was treated with  $\text{NaBH}_4$  (180 mg, 4.71 mmol) at  $-78\text{ }^\circ\text{C}$ . The mixture was warmed to  $0\text{ }^\circ\text{C}$  over 20 min. The reaction was quenched with 1 M  $\text{HCl}$  (5 mL) and extracted with  $\text{CH}_2\text{Cl}_2$ . The combined  $\text{CH}_2\text{Cl}_2$  extracts were washed with brine, dried ( $\text{MgSO}_4$ ), and concentrated to yield 450 mg of crude product. Flash chromatography on  $\text{MeOH}$ -deactivated silica gel (9:1

hexanes/EtOAc) gave 420 mg (87%) of **10**:  $^1\text{H}$  NMR 4.97 (s, 1), 4.88 (s, 1), 3.50-3.43 (m, 1), 2.98-2.93 (m, 1), 2.85 (d, 1,  $J = 17.1$ ), 2.59 (dd, 1,  $J = 15.9, 3.7$ ), 2.33 (d, 1,  $J = 15.9$ ), 2.17 (dd, 1,  $J = 11.0, 6.2$ ), 2.02 (d, 1,  $J = 17.1$ ), 1.96-1.85 (m, 4), 1.64-1.40 (m, 4);  $^{13}\text{C}$  NMR 213.1, 151.5, 108.0, 71.6, 59.6, 49.4, 49.1, 42.3, 40.4, 31.9, 29.4, 27.1, 24.2; IR (neat) 3445, 2935, 2862, 1704, 1660, 1448, 1411, 1226, 1047, 882; HRMS (EI+) Calcd for  $\text{C}_{13}\text{H}_{18}\text{O}_2$  ( $\text{M}^+$ ) 206.1307, found 206.1311.

**(4R,4aR,7S,9S,9aS)-rel-Octahydro-6-methylene-4a,7-methano-4aH-benzocycloheptene-4,9-diol (11)**. A solution of **10** (356 mg, 1.73 mmol) in THF (20 mL) was treated with L-Selectride (1 M in THF, 6.8 mL, 6.8 mmol) at  $-78\text{ }^\circ\text{C}$ . The cold bath was removed and the reaction mixture was stirred for 2 h. The reaction was quenched by 3 M NaOH (3 mL) and 30%  $\text{H}_2\text{O}_2$  (3 mL). The resulting mixture was stirred vigorously at  $25\text{ }^\circ\text{C}$  overnight. The layers were separated and the aqueous layer was extracted with  $\text{CH}_2\text{Cl}_2$ . The combined  $\text{CH}_2\text{Cl}_2$  extracts were washed with  $\text{H}_2\text{O}$  and brine, dried ( $\text{MgSO}_4$ ), and concentrated to yield 406 mg of crude product. Flash chromatography on MeOH-deactivated silica gel (7:1 hexanes/EtOAc) gave 298 mg (83%) of a 12:1 inseparable mixture of **11** and the 9R-isomer:  $^1\text{H}$  NMR 5.09 (s, 1), 4.93 (s, 1), 3.64-3.60 (m, 1), 3.53-3.48 (m, 1), 2.83 (d, 1,  $J = 16.7$ ), 2.75-2.72 (m, 1), 2.46 (d, 1,  $J = 16.7$ ), 2.00 (ddd, 1,  $J = 11.6, 4.9, 2.4$ ), 1.87-1.68 (m, 4), 1.62-1.48 (m, 3), 1.47-1.25 (m, 3);  $^{13}\text{C}$  NMR 155.6, 106.4, 72.9, 72.8, 50.1, 48.6, 41.8, 40.6, 39.4, 32.1, 29.7, 27.8, 24.1; IR (neat) 3395, 2926, 2860, 1699, 1654, 1448, 1344, 1279, 1085, 1047; HRMS (EI+) Calcd for  $\text{C}_{13}\text{H}_{20}\text{O}_2$  ( $\text{M}^+$ ) 208.1463, found 208.1463.

Partial data for the 9R-isomer of **11** were determined from the mixture: 4.98 (s, 1), 4.88 (s, 1), 3.77-3.71 (m, 1), 2.97-2.94 (m, 1), 2.66-2.50 (m, 2), 2.33 (d, 1,  $J = 15.9$ ).

**Cyclization of 11 to Give 12**. A mixture of **11** (201 mg, 0.97 mmol),  $\text{CH}_2\text{Cl}_2$  (4 mL), and TFA (6 mL) was stirred at  $0\text{ }^\circ\text{C}$  for 2 h and concentrated under reduced pressure at  $0\text{ }^\circ\text{C}$ . The residue was dissolved in MeOH (15 mL) and the resulting solution was treated with  $\text{K}_2\text{CO}_3$  (30 mg) at  $25\text{ }^\circ\text{C}$ . The reaction mixture was stirred for 30 min and  $\text{H}_2\text{O}$  (5 mL) and  $\text{CH}_2\text{Cl}_2$  (20 mL) were added. The layers were separated and the aqueous layer was extracted with and  $\text{CH}_2\text{Cl}_2$ .

The combined CH<sub>2</sub>Cl<sub>2</sub> extracts were washed with brine, dried (MgSO<sub>4</sub>), and concentrated to yield 220 mg of crude product. Flash chromatography on MeOH-deactivated silica gel (9:1 hexanes/EtOAc) gave 181 mg (90%) of **12**.

**Dehydration of 12 to Give 13.** To a solution of **12** (176 mg, 0.84 mmol) and pyridine (2.5 mL) in CH<sub>2</sub>Cl<sub>2</sub> (25 mL) at -78 °C was added Tf<sub>2</sub>O (0.58 mL, 3.38 mmol). The cold bath was removed and the reaction mixture was allowed to warm to -5 °C over 15 min and treated with isopropanol (0.27 mL, 3.38 mmol) to quench the excess Tf<sub>2</sub>O. The resulting solution was stirred at 25 °C for 15 min and quenched with saturated NaHCO<sub>3</sub> solution. The layers were separated and the aqueous layer was extracted with Et<sub>2</sub>O. The combined Et<sub>2</sub>O extracts were shaken with 1 M HCl for a couple of minutes (this effects elimination of the triflate to give the alkene), saturated CuSO<sub>4</sub> solution, H<sub>2</sub>O, and brine, dried (MgSO<sub>4</sub>), and concentrated to yield 143 mg of crude product. Flash chromatography on silica gel (99:1 hexanes/EtOAc) gave 135 mg (84%) of **13**.

**Oxidation of 13 with CrO<sub>3</sub>•dimethylpyrazole.** To a suspension of CrO<sub>3</sub> (180 mg, 1.8 mmol) in CH<sub>2</sub>Cl<sub>2</sub> (4 mL) at -25 °C was added 3,5-dimethylpyrazole (173 mg, 1.8 mmol). The mixture was stirred for 20 min and treated with a solution of **13** (17 mg, 0.09 mmol) in CH<sub>2</sub>Cl<sub>2</sub> (2 mL). The reaction mixture was stirred at -25 °C for 20 h. and aqueous NaOH (6 M, 1 mL) was added. The cold bath was removed and the mixture was stirred for 1 h and diluted with H<sub>2</sub>O. The layers were separated and the aqueous layer was extracted with CH<sub>2</sub>Cl<sub>2</sub>. The combined CH<sub>2</sub>Cl<sub>2</sub> extracts were washed with 1 M HCl and brine, dried (MgSO<sub>4</sub>), and concentrated to yield 18 mg of crude product. Flash chromatography on silica gel (99:1 to 4:1 hexanes/EtOAc) gave 2 mg (12%) of recovered **13** followed by 14 mg (75%) of an inseparable 4:1 mixture of **2** and **15**.

Partial data for **15** were determined from the mixture: <sup>1</sup>H NMR 6.93 (ddd, 1, *J* = 9.7, 5.5, 3.1), 6.03 (ddd, 1, *J* = 9.7, 2.4, 1.2), 4.20 (dd, 1, *J* = 3.4, 3.4), 2.17 (d, 1, *J* = 11.6), 1.80 (dd, 1, *J* = 14.6, 3.7); <sup>13</sup>C NMR 200.7, 147.7, 129.3, 86.3, 78.6, 53.7, 47.0, 44.5, 41.6, 41.1, 38.3, 26.4, 23.1.

**(1S,3S,4S,5aS)-rel-4,5-Dihydro-3-methyl-3H-1,4:3,5a-Dimethano-2-benzoxepin-8(1H)-one (16).** A mixture of **13** (21 mg, 0.11 mmol), SeO<sub>2</sub> (98 mg, 0.88 mmol) and dioxane (2 mL)



was heated to 140 °C for 30 min in a sealed vessel (100-130 psi) in a microwave oven. The solution was filtrated through Celite, which was washed with CH<sub>2</sub>Cl<sub>2</sub>. The combined filtrates were washed with saturated NaHCO<sub>3</sub> solution, H<sub>2</sub>O, and brine, dried (MgSO<sub>4</sub>), and concentrated to yield 30 mg of crude product. Flash chromatography on silica gel (8:1 hexanes/EtOAc) gave 13 mg (59%) of dienone **16** followed by 6 mg (27%) of alcohol **17**.

Data for **16**: <sup>1</sup>H NMR 6.67 (d, 1, *J* = 10.0), 6.32 (d, 1, *J* = 10.0), 6.13 (s, 1), 4.72 (d, 1, *J* = 4.3), 2.60 (dd, 1, *J* = 6.1, 6.1), 2.78-2.13 (m, 2), 1.99 (d, 1, *J* = 11.6), 1.96 (dd, 1 *J* = 11.6, 3.1, 3.1), 1.79 (d, 1, *J* = 11.6), 1.54 (dd, 1, *J* = 7.9, 3.1), 1.52 (s, 3); <sup>13</sup>C NMR 187.1, 160.5, 151.0, 130.0, 121.8, 87.1, 80.0, 54.8, 49.9, 48.6, 44.3, 42.5, 22.2; IR (neat) 2966, 2866, 1720, 1695, 1660, 1631, 1446, 1286, 1246, 1148, 1085, 1034, 1015, 942, 888, 932; HRMS (EI+) Calcd for C<sub>13</sub>H<sub>14</sub>O<sub>2</sub> (M<sup>+</sup>) 202.0994, found 202.0993.

**(1S,3S,4S,5aS,8S,9aS)-rel-1,4,5,8,9,9a-Hexahydro-3-methyl-3H-1,4:3,5a-dimethano-2-benzoxepin-8-ol (17)**. A mixture of **13** (66 mg, 0.35 mmol), SeO<sub>2</sub> (117 mg, 1.05 mmol) and dioxane (6 mL) was heated to 110 °C for 10 min in a sealed vessel (20 psi) in a microwave oven. The solution was filtrated through Celite, which was washed with CH<sub>2</sub>Cl<sub>2</sub>. The combined filtrates were washed with saturated NaHCO<sub>3</sub> solution, H<sub>2</sub>O, and brine, dried (MgSO<sub>4</sub>), and concentrated to yield 93 mg of crude product. Flash chromatography on silica gel (4:1 hexanes/EtOAc) gave 5 mg (7%) of enone **2** followed by 59 mg (83%) of **17**: <sup>1</sup>H NMR 5.76 (dd, 1, *J* = 9.8, 4.3), 5.57 (d, 1, *J* = 9.8), 4.19 (dd, 1, *J* = 4.3, 4.3), 4.16 (dd, 1, *J* = 3.4, 3.4), 2.18 (dd, 1, *J* = 6.1, 6.1), 2.12 (ddd, 1, *J* = 12.3, 3.7, 3.7) 1.96-1.60 (m, 6), 1.56-1.50 (m, 2), 1.41 (s, 3); <sup>13</sup>C NMR 137.4, 127.5, 86.7, 80.2, 64.3, 52.2, 45.8, 44.2, 42.8, 38.0, 37.7, 31.2, 23.2; IR (neat) 3406, 2946, 2867, 1644, 1473, 1446, 1378, 1327, 1222, 1140, 1007, 981, 823; HRMS (EI+) Calcd for C<sub>13</sub>H<sub>18</sub>O<sub>2</sub> (M<sup>+</sup>) 206.1307, found 206.1309.

**(1S,3S,4S,5aS,9aS)-rel-4,5,9,9a-tetrahydro-3-methyl-3H-1,4:3,5a-Dimethano-2-benzoxepin-8(1H)-one (2)**. A mixture of alcohol **17** (57 mg, 0.29 mmol) and activated MnO<sub>2</sub> (90%, 190 mg, 1.97 mmol) in CH<sub>2</sub>Cl<sub>2</sub> (15 mL) was stirred vigorously at 25 °C for 1 d. The solution was filtrated through Celite, which was washed with CH<sub>2</sub>Cl<sub>2</sub>. The combined filtrates

were concentrated to give 53 mg (94%) of pure **2**:  $^1\text{H}$  NMR 6.62 (d, 1,  $J = 9.8$ ), 5.94 (d, 1,  $J = 9.8$ ), 4.16 (dd, 1,  $J = 3.4, 3.4$ ), 2.43-2.27 (m, 4), 1.95-1.93 (m, 2), 1.89 (d, 1,  $J = 11.6$ ), 1.79-1.74 (m, 2), 1.66 (d, 1,  $J = 11.0$ ), 1.45 (s, 3);  $^{13}\text{C}$  NMR 199.1, 155.2, 128.8, 87.0, 78.9, 51.6, 46.2, 44.1, 42.7, 42.2, 37.9, 37.4, 23.1; IR (neat) 2959, 1679, 1448, 1378, 1326, 1281, 1137, 1082, 1037, 993, 820; HRMS (EI+) Calcd for  $\text{C}_{13}\text{H}_{16}\text{O}_2$  ( $\text{M}^+$ ) 204.1150, found 204.1154. The data are identical to those previously reported.<sup>2</sup>

### References

14. (a) Milstein, D.; Stille, J. K. *J. Am. Chem. Soc.* **1978**, *100*, 3636-3638. (b) Leibner, J. E.; Jacobus, J. *J. Org. Chem.* **1979**, *44*, 449-450.

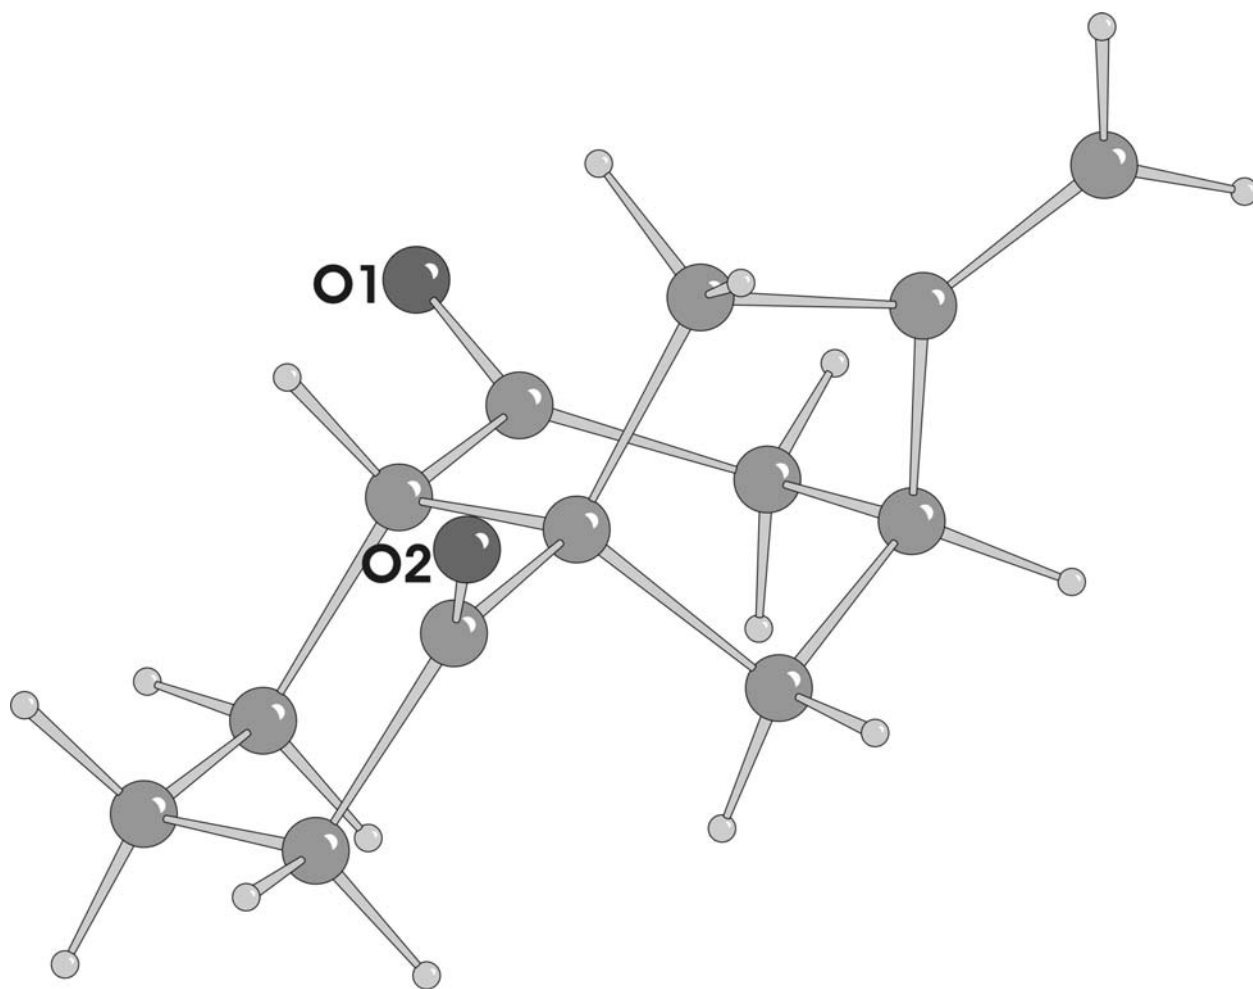**5**Molecular Structure of **5** Established by X-ray Structure Determination

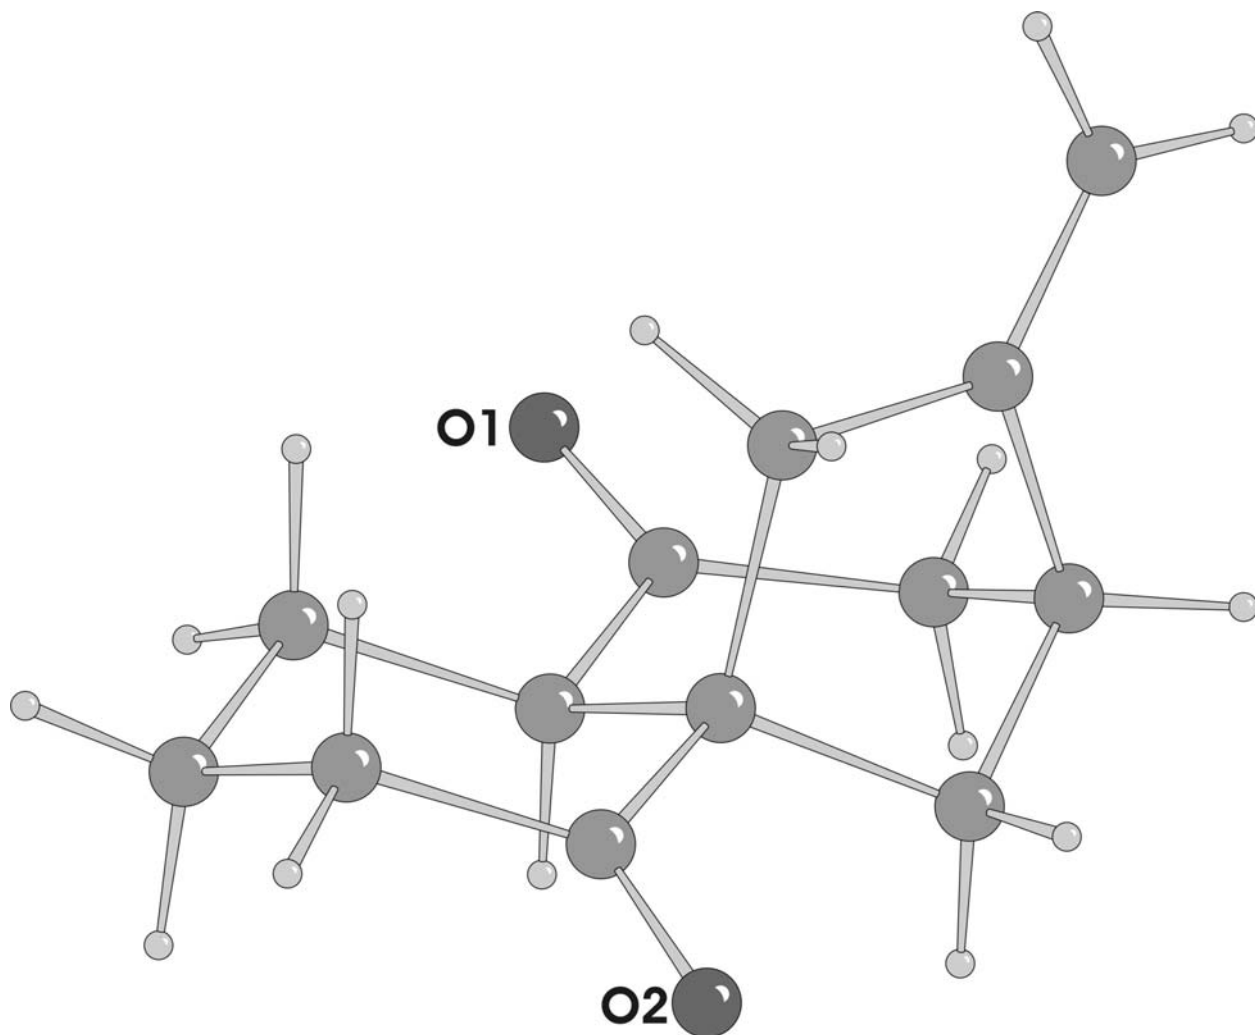**9**

Molecular Structure of **9** Established by X-ray Structure Determination

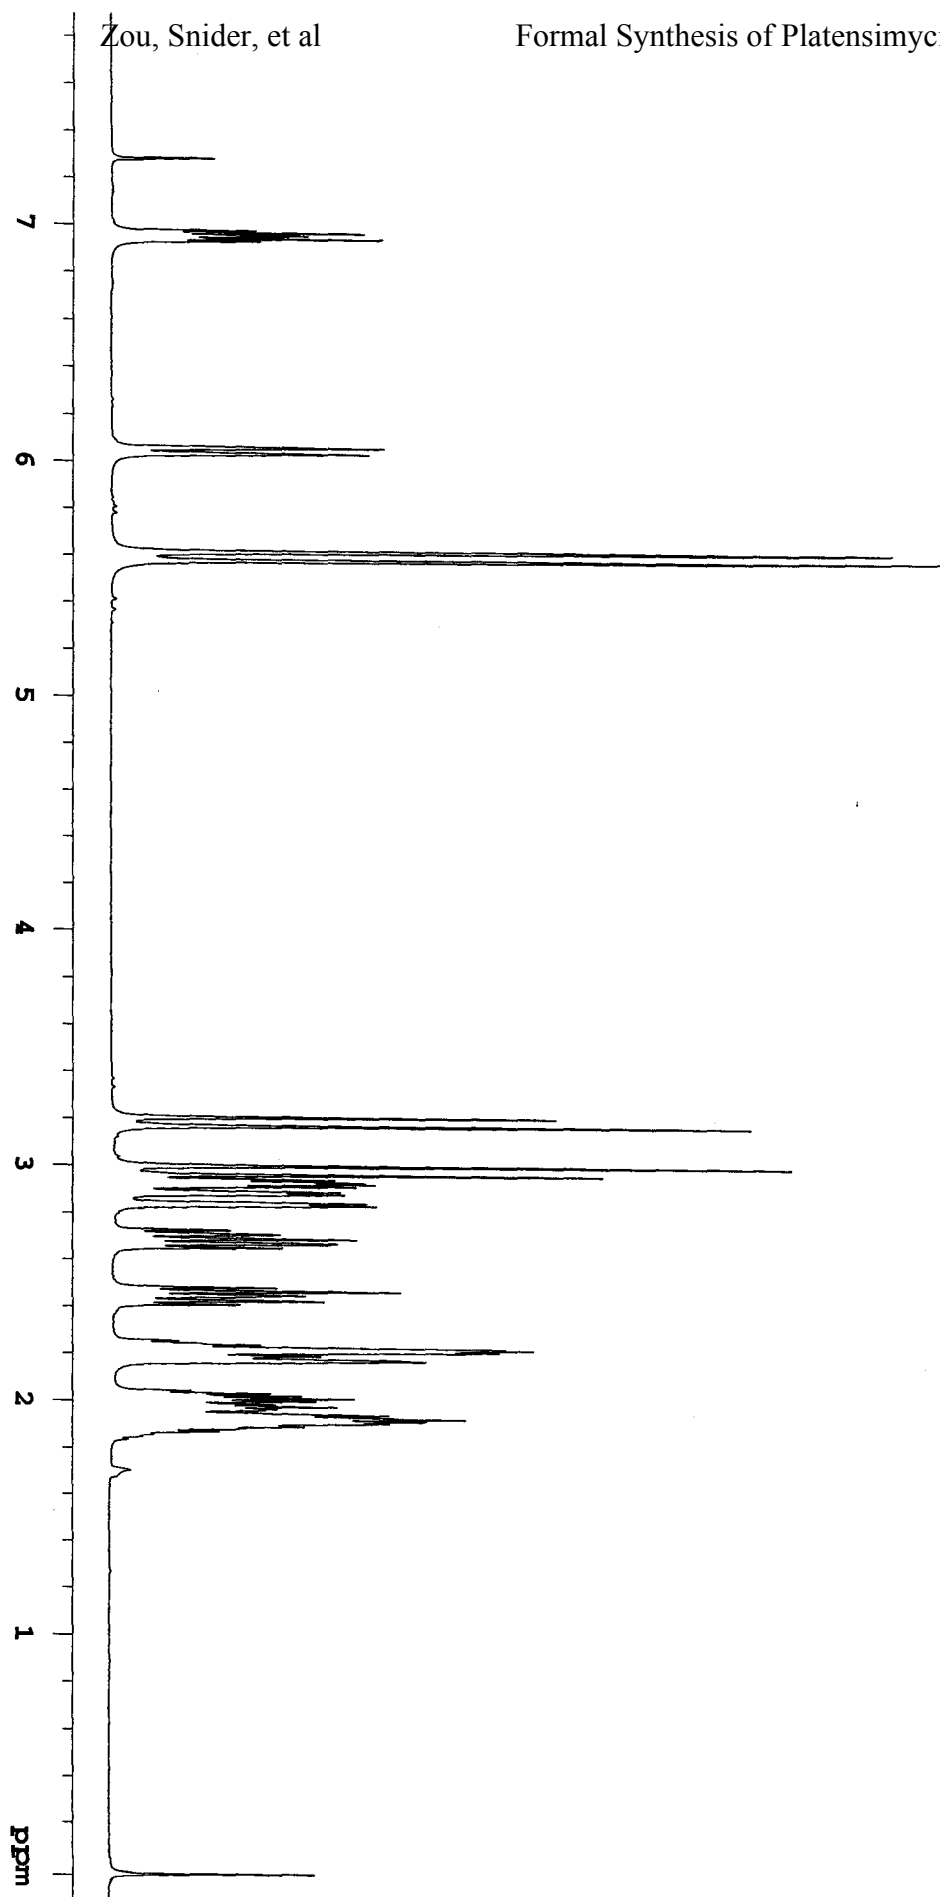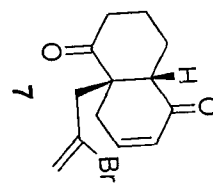

| INDEX | FREQUENCY | PPM     | HEIGHT |
|-------|-----------|---------|--------|
| 1     | 21107.351 | 209.986 | 27.8   |
| 2     | 19851.553 | 197.492 | 25.3   |
| 3     | 14835.226 | 147.588 | 57.4   |
| 4     | 12937.032 | 128.704 | 66.2   |
| 5     | 12808.859 | 127.428 | 27.0   |
| 6     | 12283.193 | 122.199 | 88.3   |
| 7     | 7771.932  | 77.319  | 69.8   |
| 8     | 7739.889  | 77.000  | 75.0   |
| 9     | 7707.845  | 76.681  | 75.8   |
| 10    | 5346.548  | 53.190  | 28.5   |
| 11    | 5260.336  | 52.332  | 77.6   |
| 12    | 4675.161  | 46.511  | 74.7   |
| 13    | 3828.298  | 38.086  | 90.0   |
| 14    | 3105.032  | 30.890  | 93.8   |
| 15    | 2368.795  | 23.566  | 88.4   |
| 16    | 2297.079  | 22.852  | 81.5   |

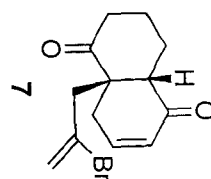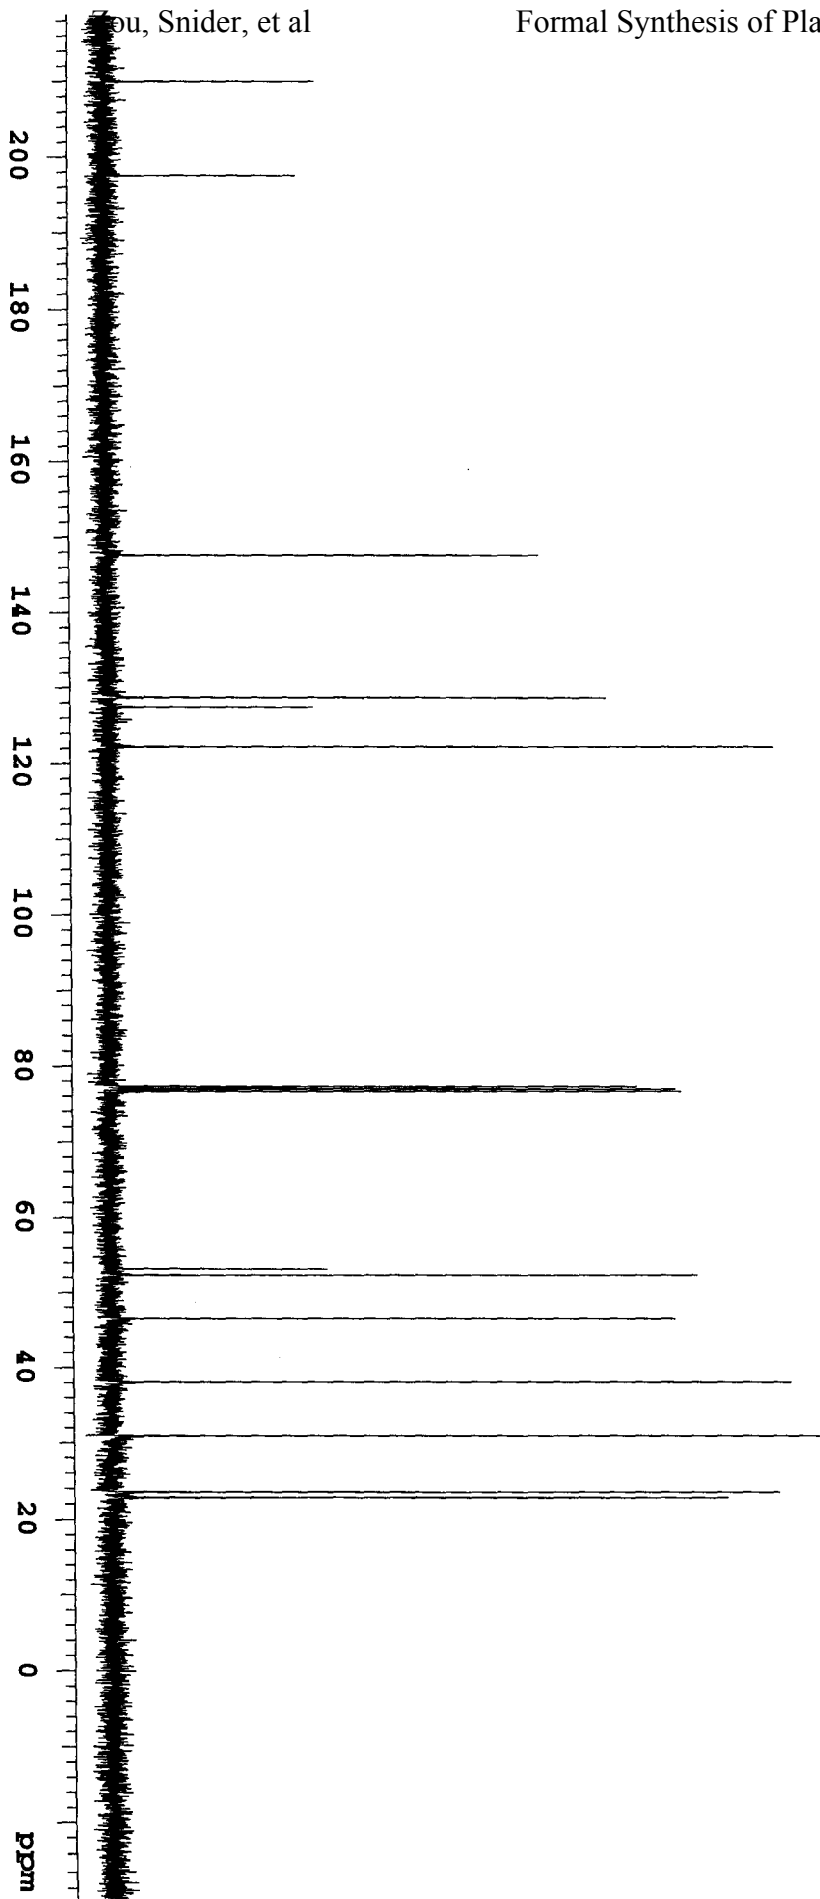

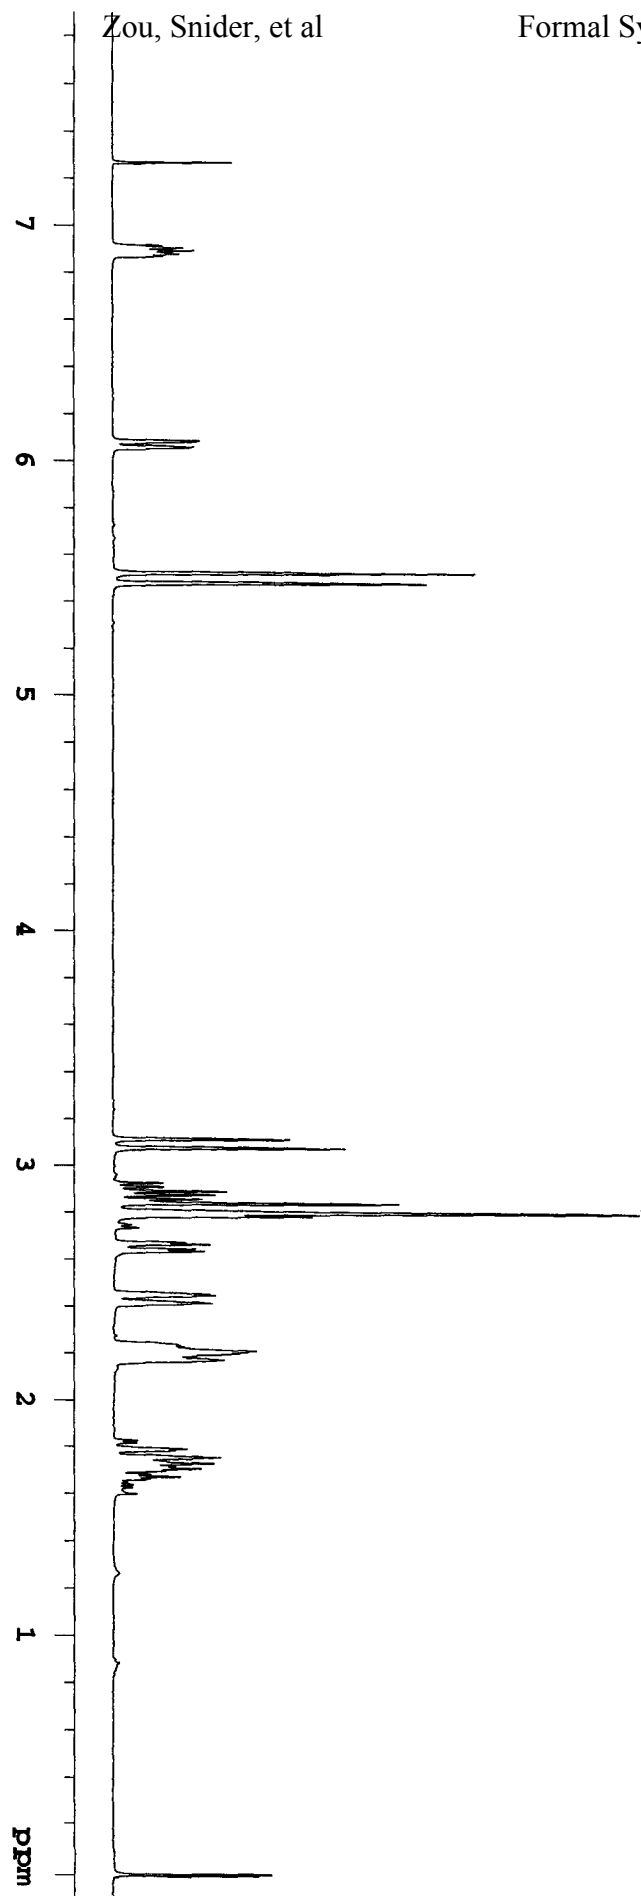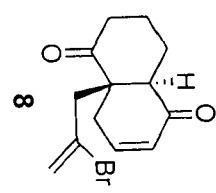

| INDEX | FREQUENCY | PPM     | HEIGHT |
|-------|-----------|---------|--------|
| 1     | 21282.827 | 211.731 | 17.8   |
| 2     | 19851.552 | 197.492 | 22.6   |
| 3     | 14735.280 | 146.593 | 47.2   |
| 4     | 12947.713 | 128.810 | 44.0   |
| 5     | 12798.940 | 127.330 | 33.9   |
| 6     | 12205.373 | 121.425 | 65.9   |
| 7     | 7771.932  | 77.319  | 126.1  |
| 8     | 7739.889  | 77.000  | 132.8  |
| 9     | 7707.845  | 76.681  | 134.0  |
| 10    | 5718.862  | 56.894  | 67.1   |
| 11    | 5542.623  | 55.141  | 32.4   |
| 12    | 4070.913  | 40.499  | 65.9   |
| 13    | 3835.165  | 38.154  | 69.1   |
| 14    | 3005.849  | 29.904  | 74.3   |
| 15    | 2585.470  | 25.721  | 65.3   |
| 16    | 1933.919  | 19.240  | 71.0   |

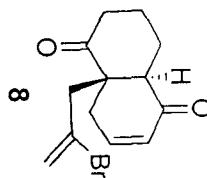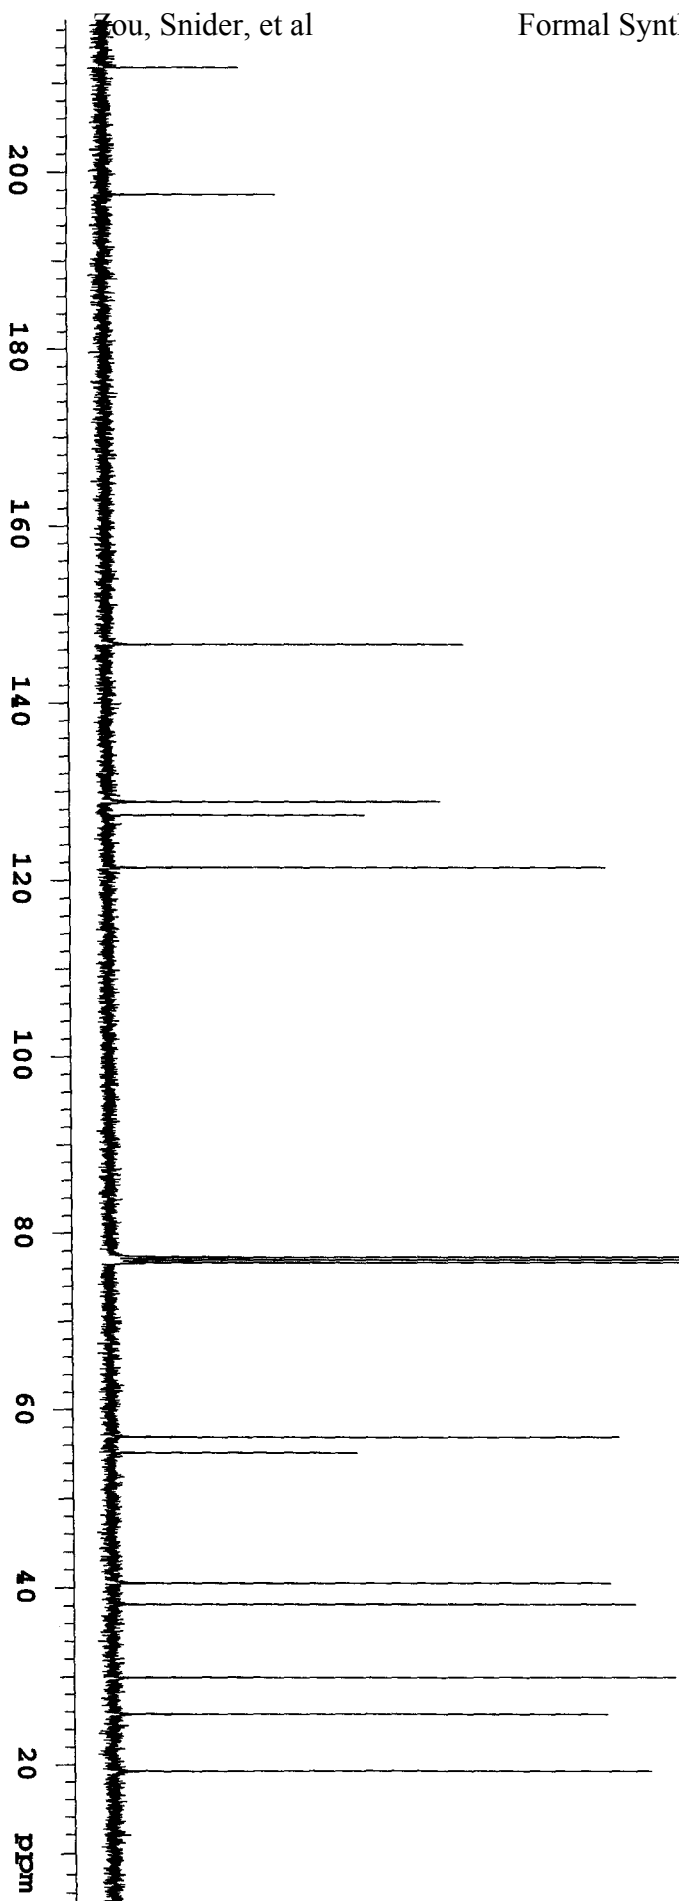



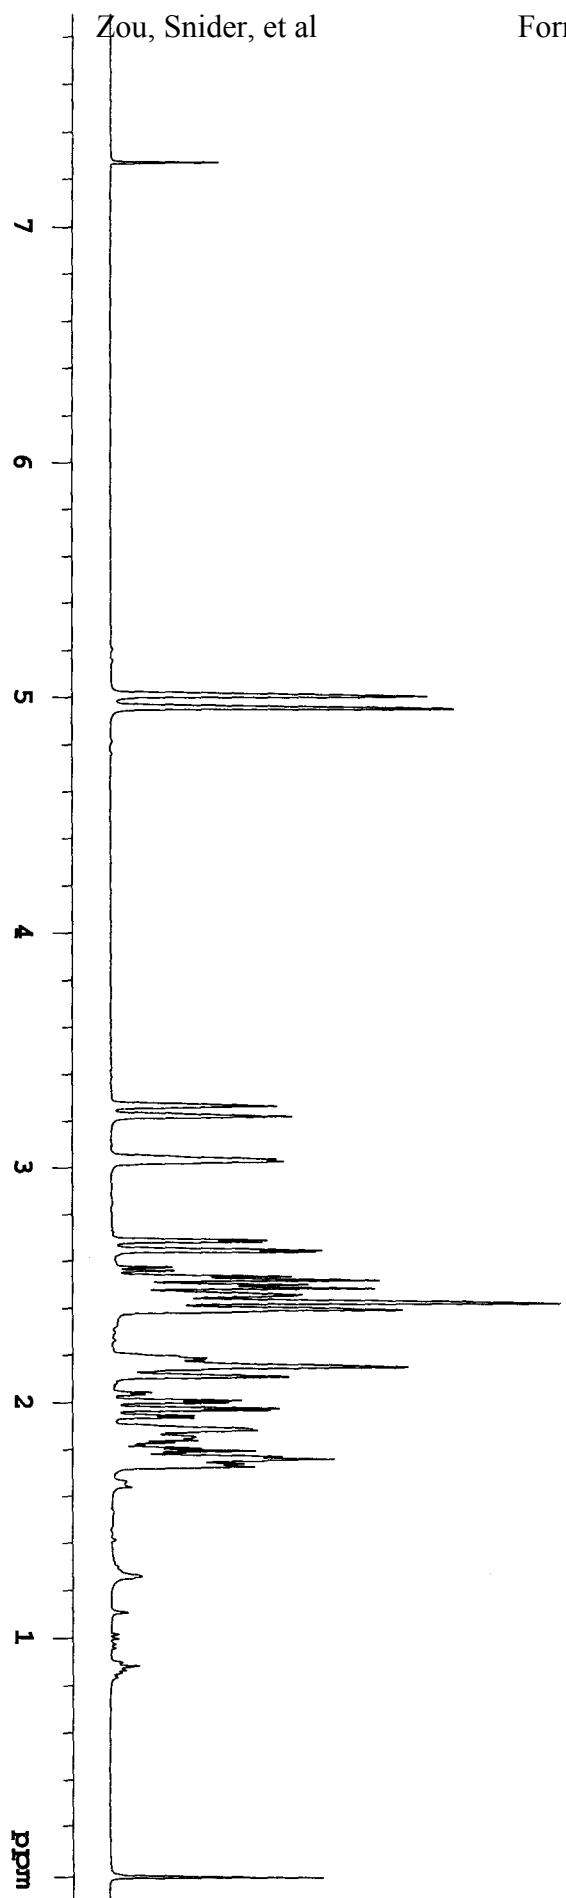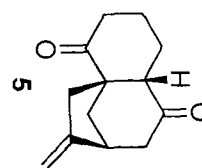

400 MHz, CDCl<sub>3</sub>

S18  
Pulse Sequence: s2pu1

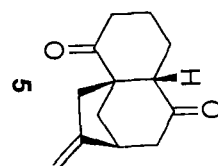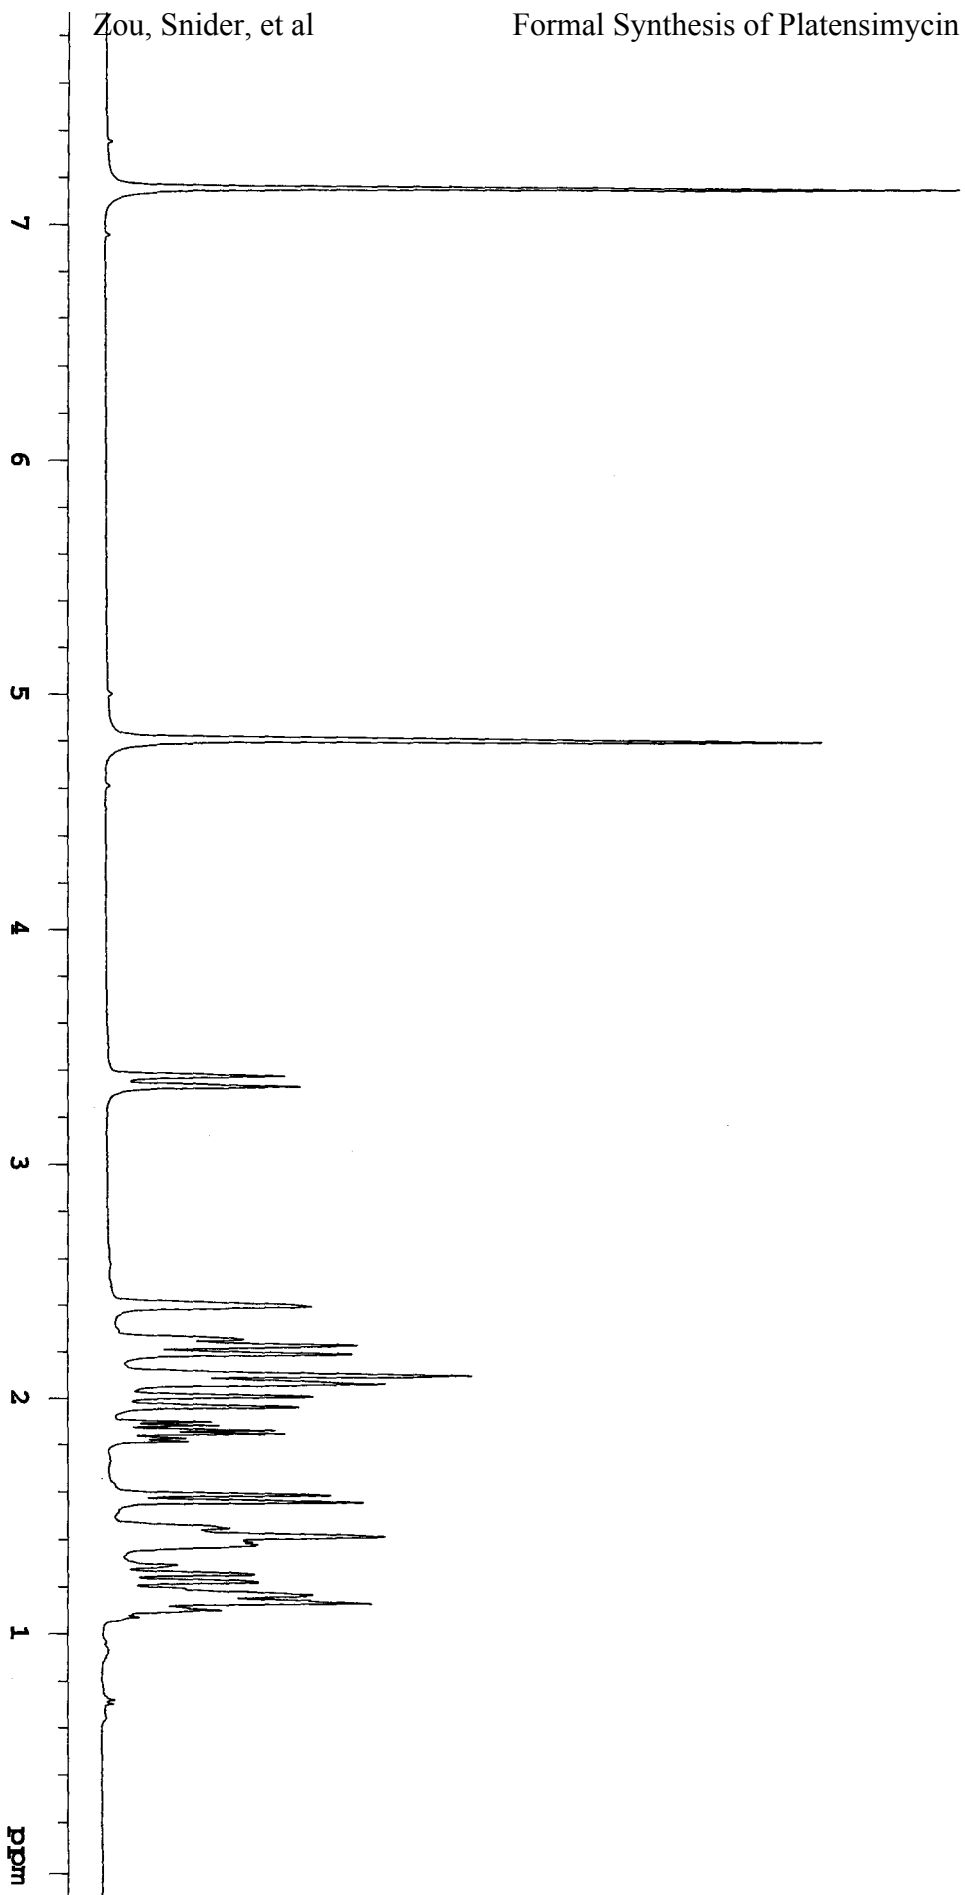

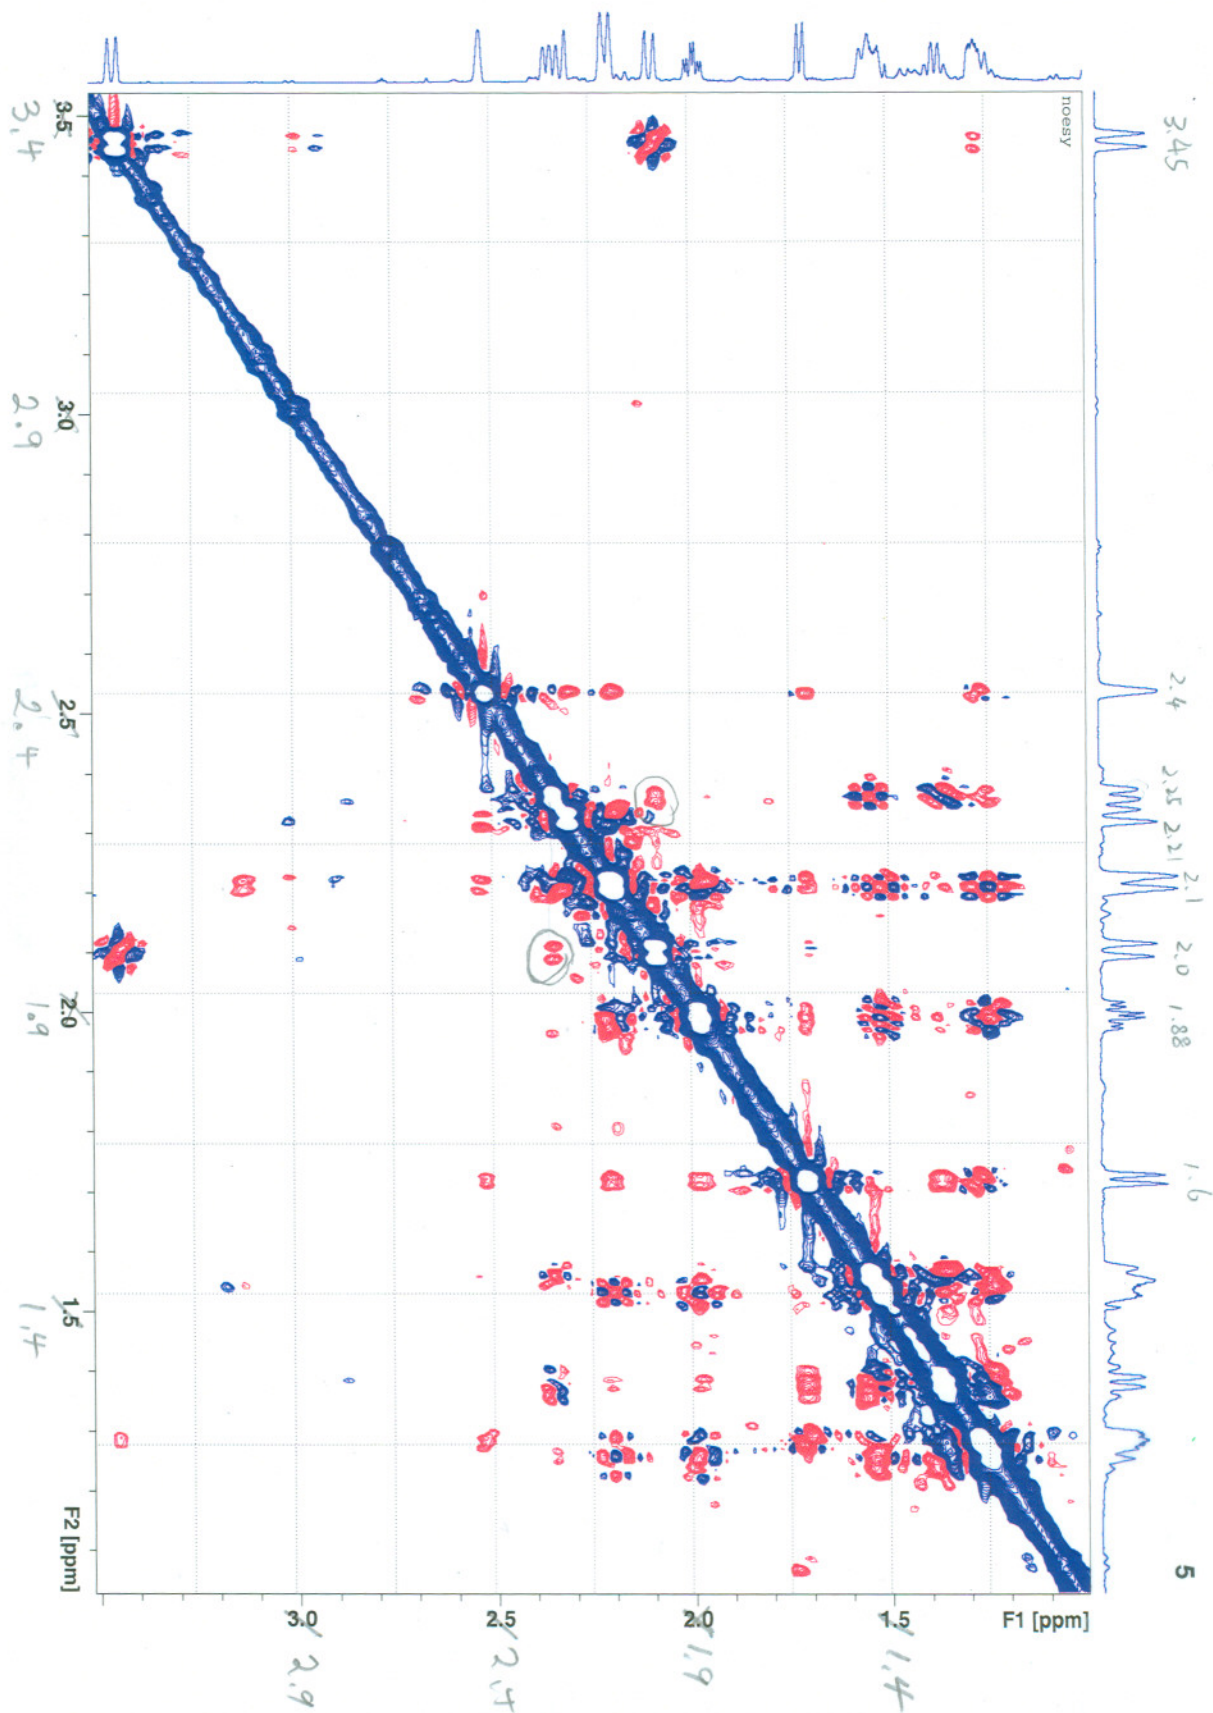

| INDEX | FREQUENCY | PPM     | HEIGHT |
|-------|-----------|---------|--------|
| 1     | 21134.054 | 210.251 | 14.6   |
| 2     | 21101.247 | 209.925 | 19.2   |
| 3     | 15090.047 | 150.123 | 20.2   |
| 4     | 10948.049 | 108.916 | 57.8   |
| 5     | 7771.932  | 77.319  | 81.5   |
| 6     | 7739.889  | 77.000  | 84.2   |
| 7     | 7707.845  | 76.681  | 83.3   |
| 8     | 6008.779  | 59.778  | 55.3   |
| 9     | 5721.151  | 56.917  | 26.8   |
| 10    | 4907.857  | 48.826  | 69.5   |
| 11    | 4278.432  | 42.564  | 51.2   |
| 12    | 3930.532  | 39.103  | 60.5   |
| 13    | 3892.385  | 38.723  | 61.5   |
| 14    | 3760.397  | 37.410  | 60.7   |
| 15    | 2706.014  | 26.921  | 61.1   |
| 16    | 2591.573  | 25.782  | 61.6   |

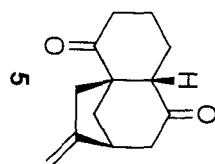

## Formal Synthesis of Platensimycin

You, Snider, et al

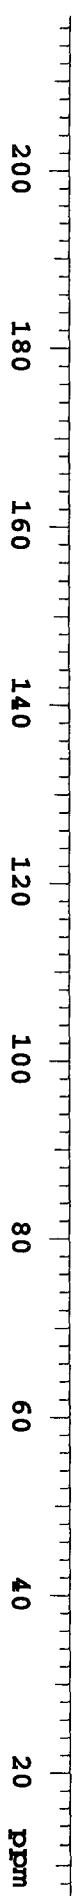

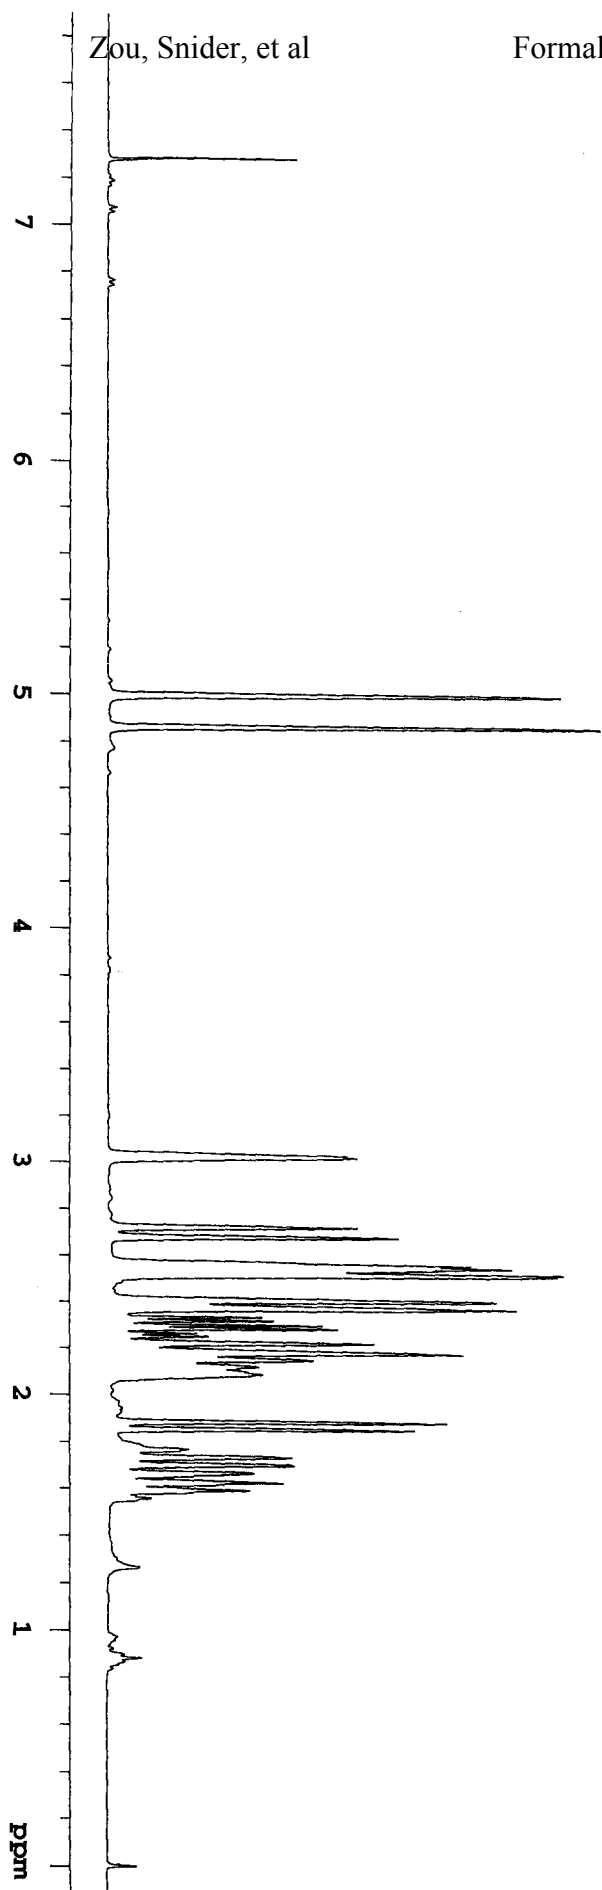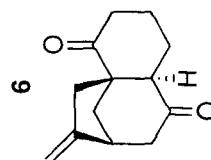

| INDEX | FREQUENCY | PPM     | HEIGHT |
|-------|-----------|---------|--------|
| 1     | 21216.451 | 211.071 | 24.8   |
| 2     | 20968.496 | 208.604 | 34.9   |
| 3     | 15058.767 | 149.812 | 54.2   |
| 4     | 10900.747 | 108.446 | 84.5   |
| 5     | 7771.932  | 77.319  | 61.6   |
| 6     | 7739.889  | 77.000  | 63.4   |
| 7     | 7707.845  | 76.681  | 63.1   |
| 8     | 5917.226  | 58.867  | 88.6   |
| 9     | 5834.066  | 58.040  | 61.6   |
| 10    | 5029.165  | 50.032  | 109.7  |
| 11    | 4228.079  | 42.063  | 86.2   |
| 12    | 3977.834  | 39.573  | 120.7  |
| 13    | 3877.126  | 38.571  | 103.8  |
| 14    | 3761.160  | 37.418  | 107.9  |
| 15    | 2436.697  | 24.241  | 90.3   |
| 16    | 2152.883  | 21.418  | 95.6   |

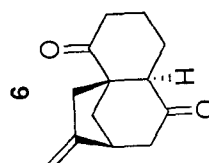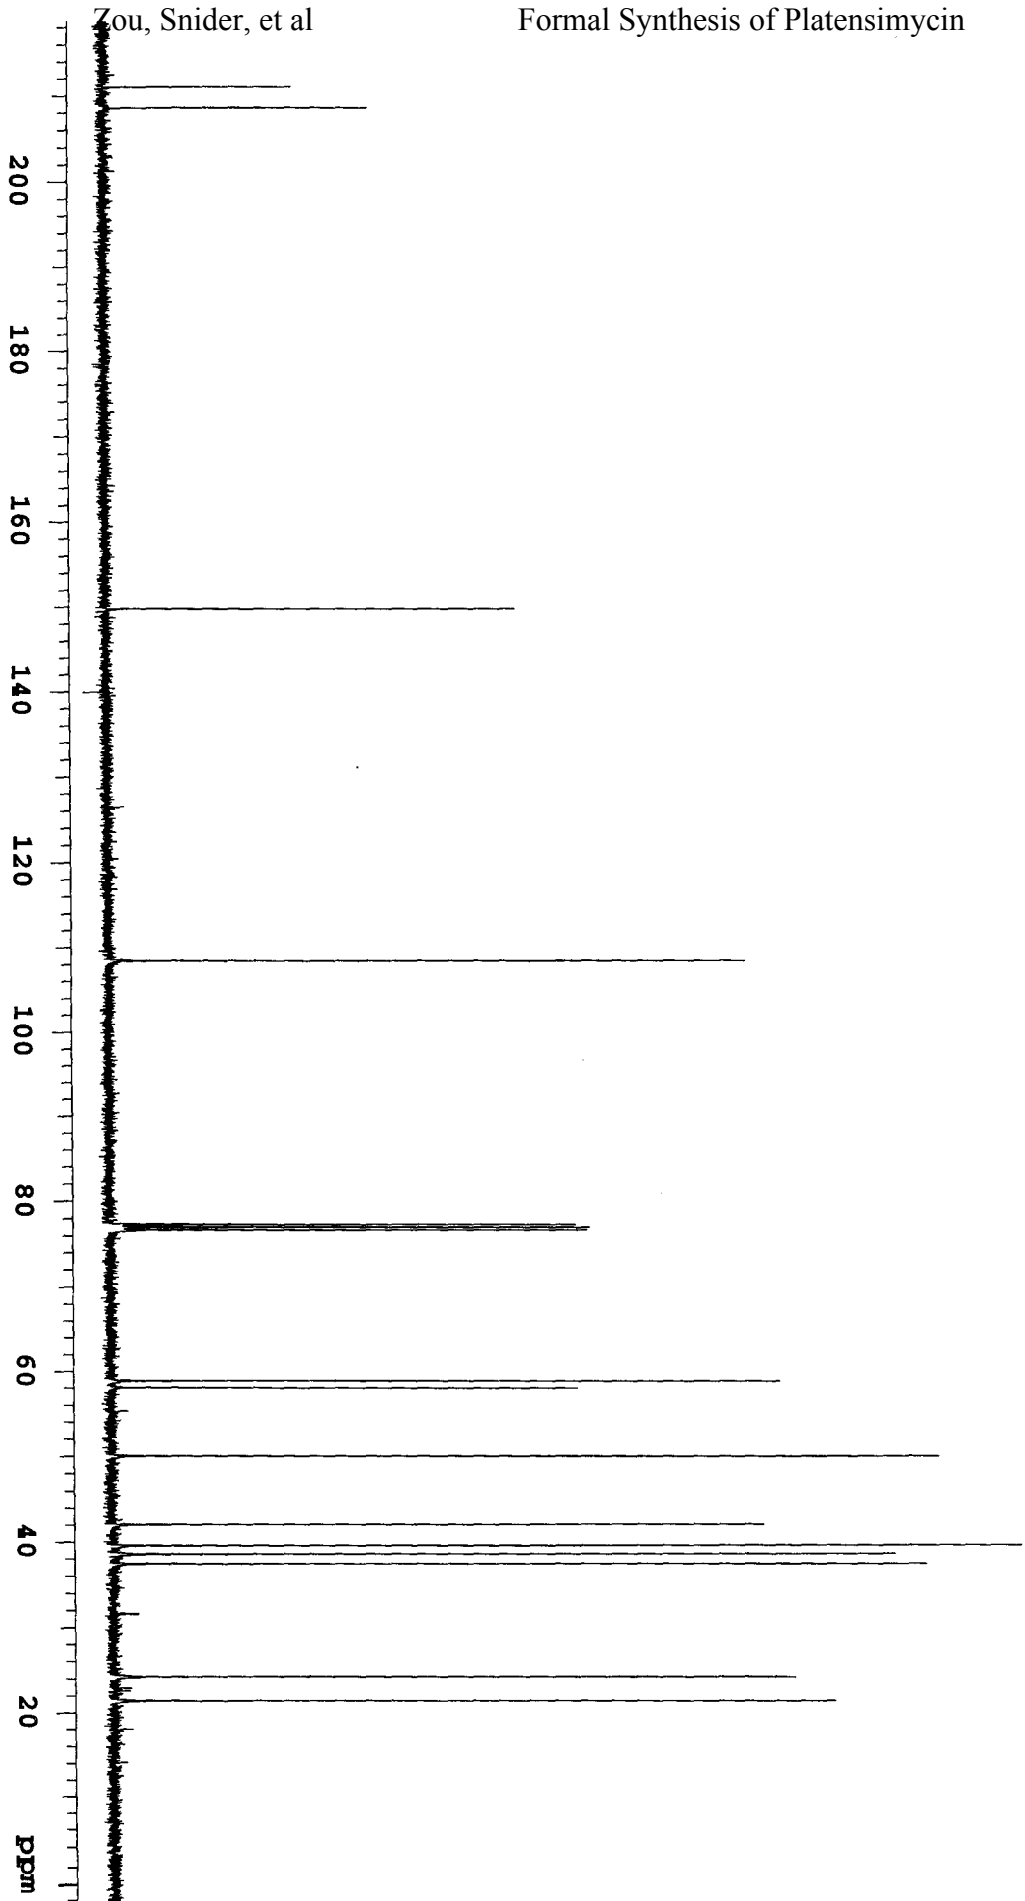

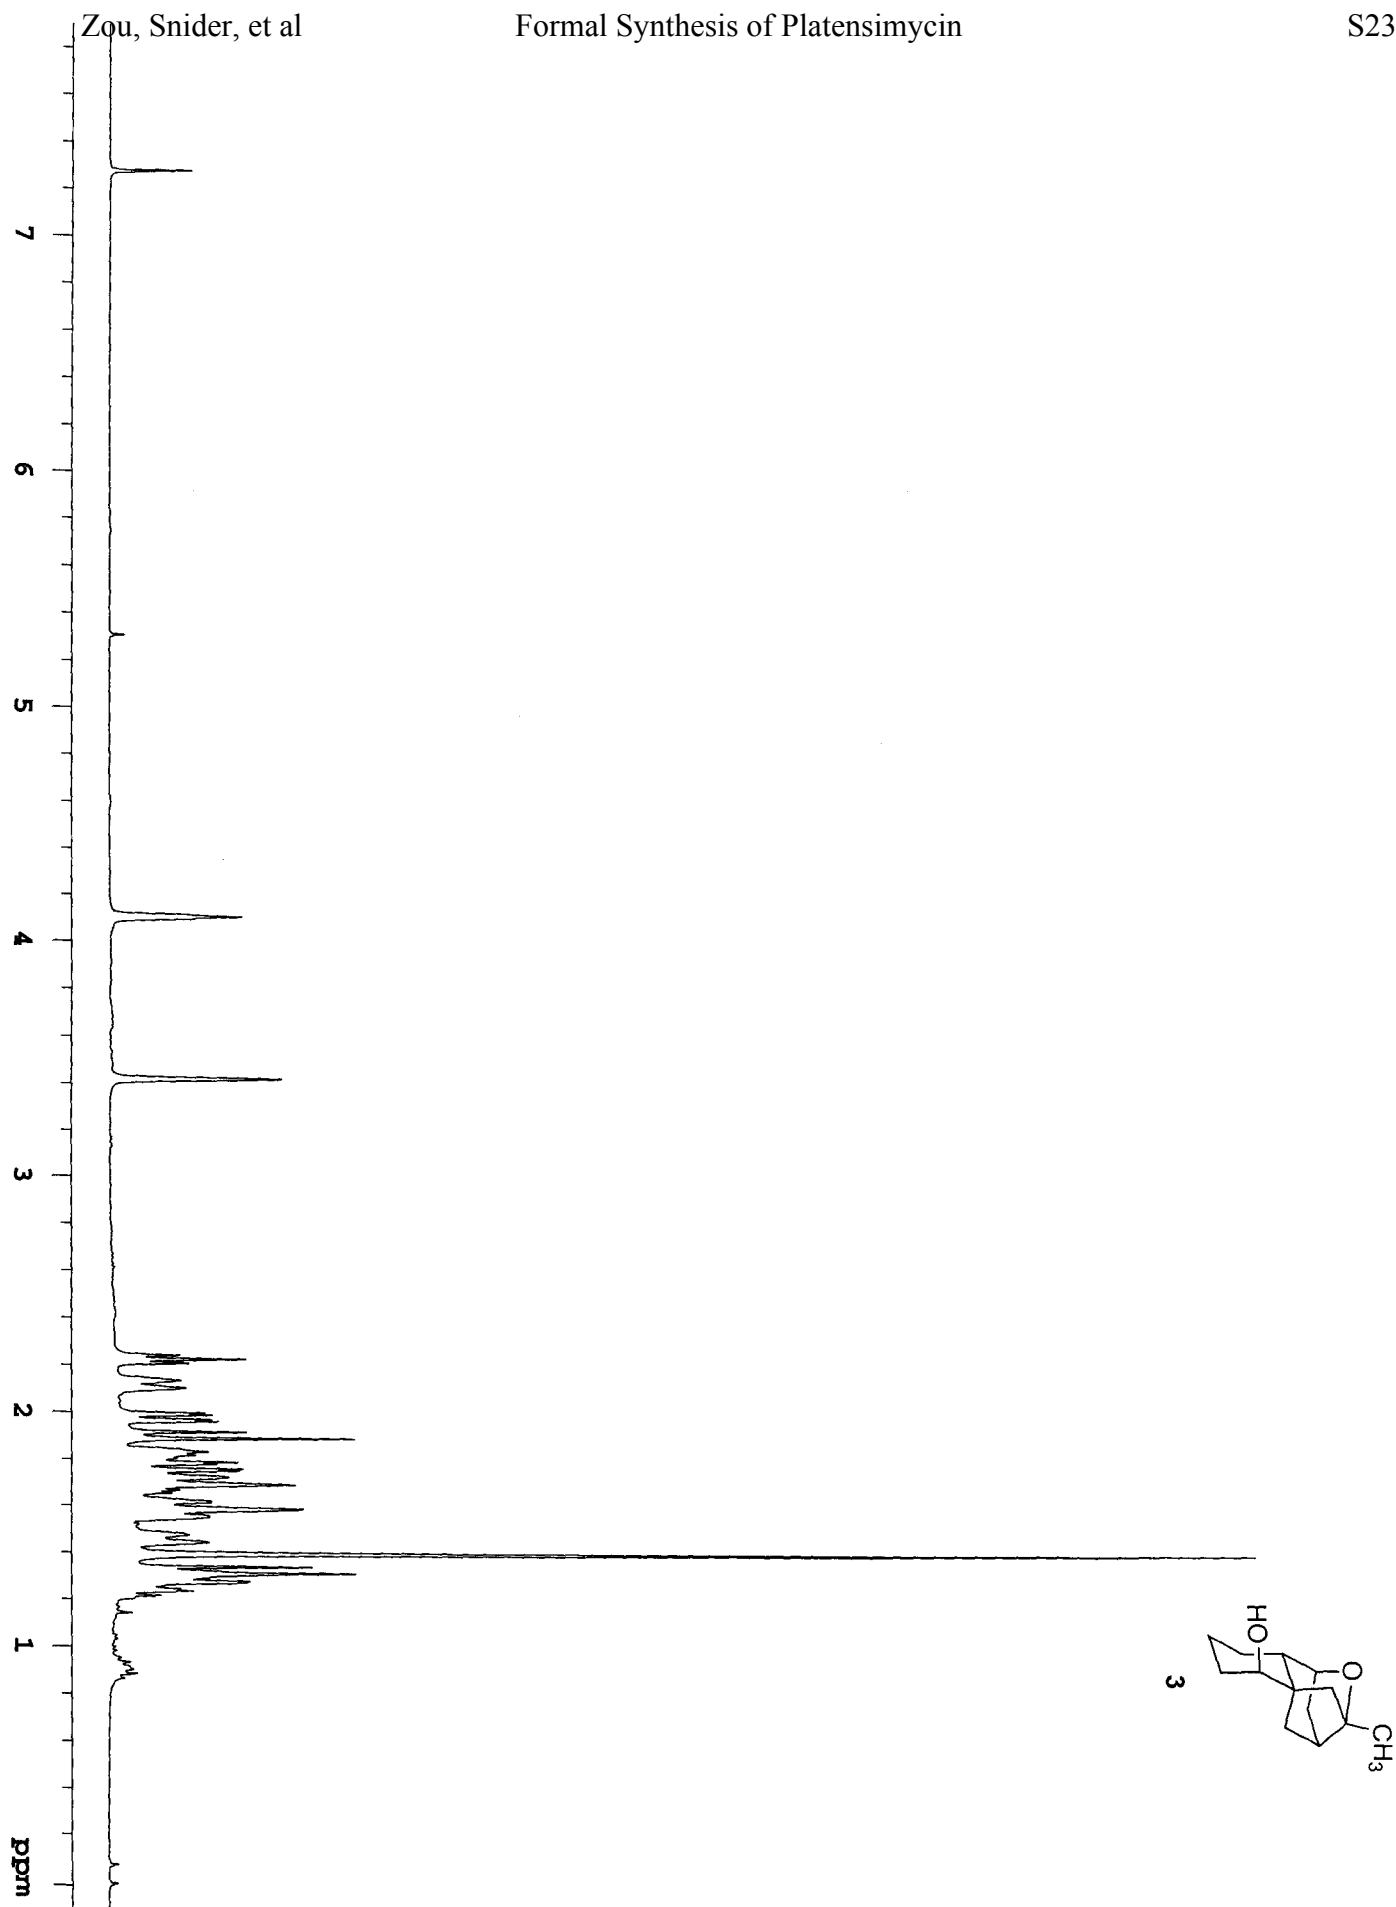

| INDEX | FREQUENCY | PPM    | HEIGHT |
|-------|-----------|--------|--------|
| 1     | 8653.127  | 86.085 | 22.9   |
| 2     | 8058.797  | 80.173 | 53.7   |
| 3     | 7771.169  | 77.311 | 93.7   |
| 4     | 7739.889  | 77.000 | 97.1   |
| 5     | 7707.845  | 76.681 | 98.8   |
| 6     | 7408.010  | 73.698 | 48.4   |
| 7     | 5021.535  | 49.957 | 64.9   |
| 8     | 4956.686  | 49.311 | 30.5   |
| 9     | 4574.453  | 45.509 | 56.9   |
| 10    | 4044.210  | 40.234 | 70.1   |
| 11    | 3956.472  | 39.361 | 62.2   |
| 12    | 3844.320  | 38.245 | 72.7   |
| 13    | 3032.552  | 30.169 | 69.2   |
| 14    | 2532.827  | 25.198 | 63.2   |
| 15    | 2343.618  | 23.315 | 64.7   |
| 16    | 1997.243  | 19.870 | 64.6   |

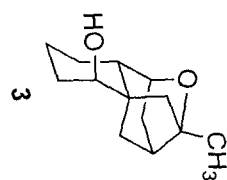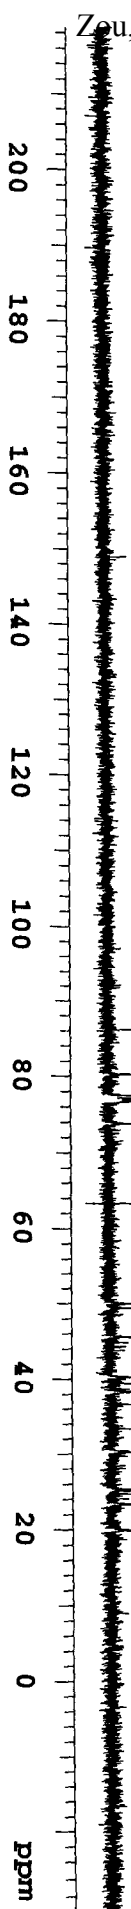



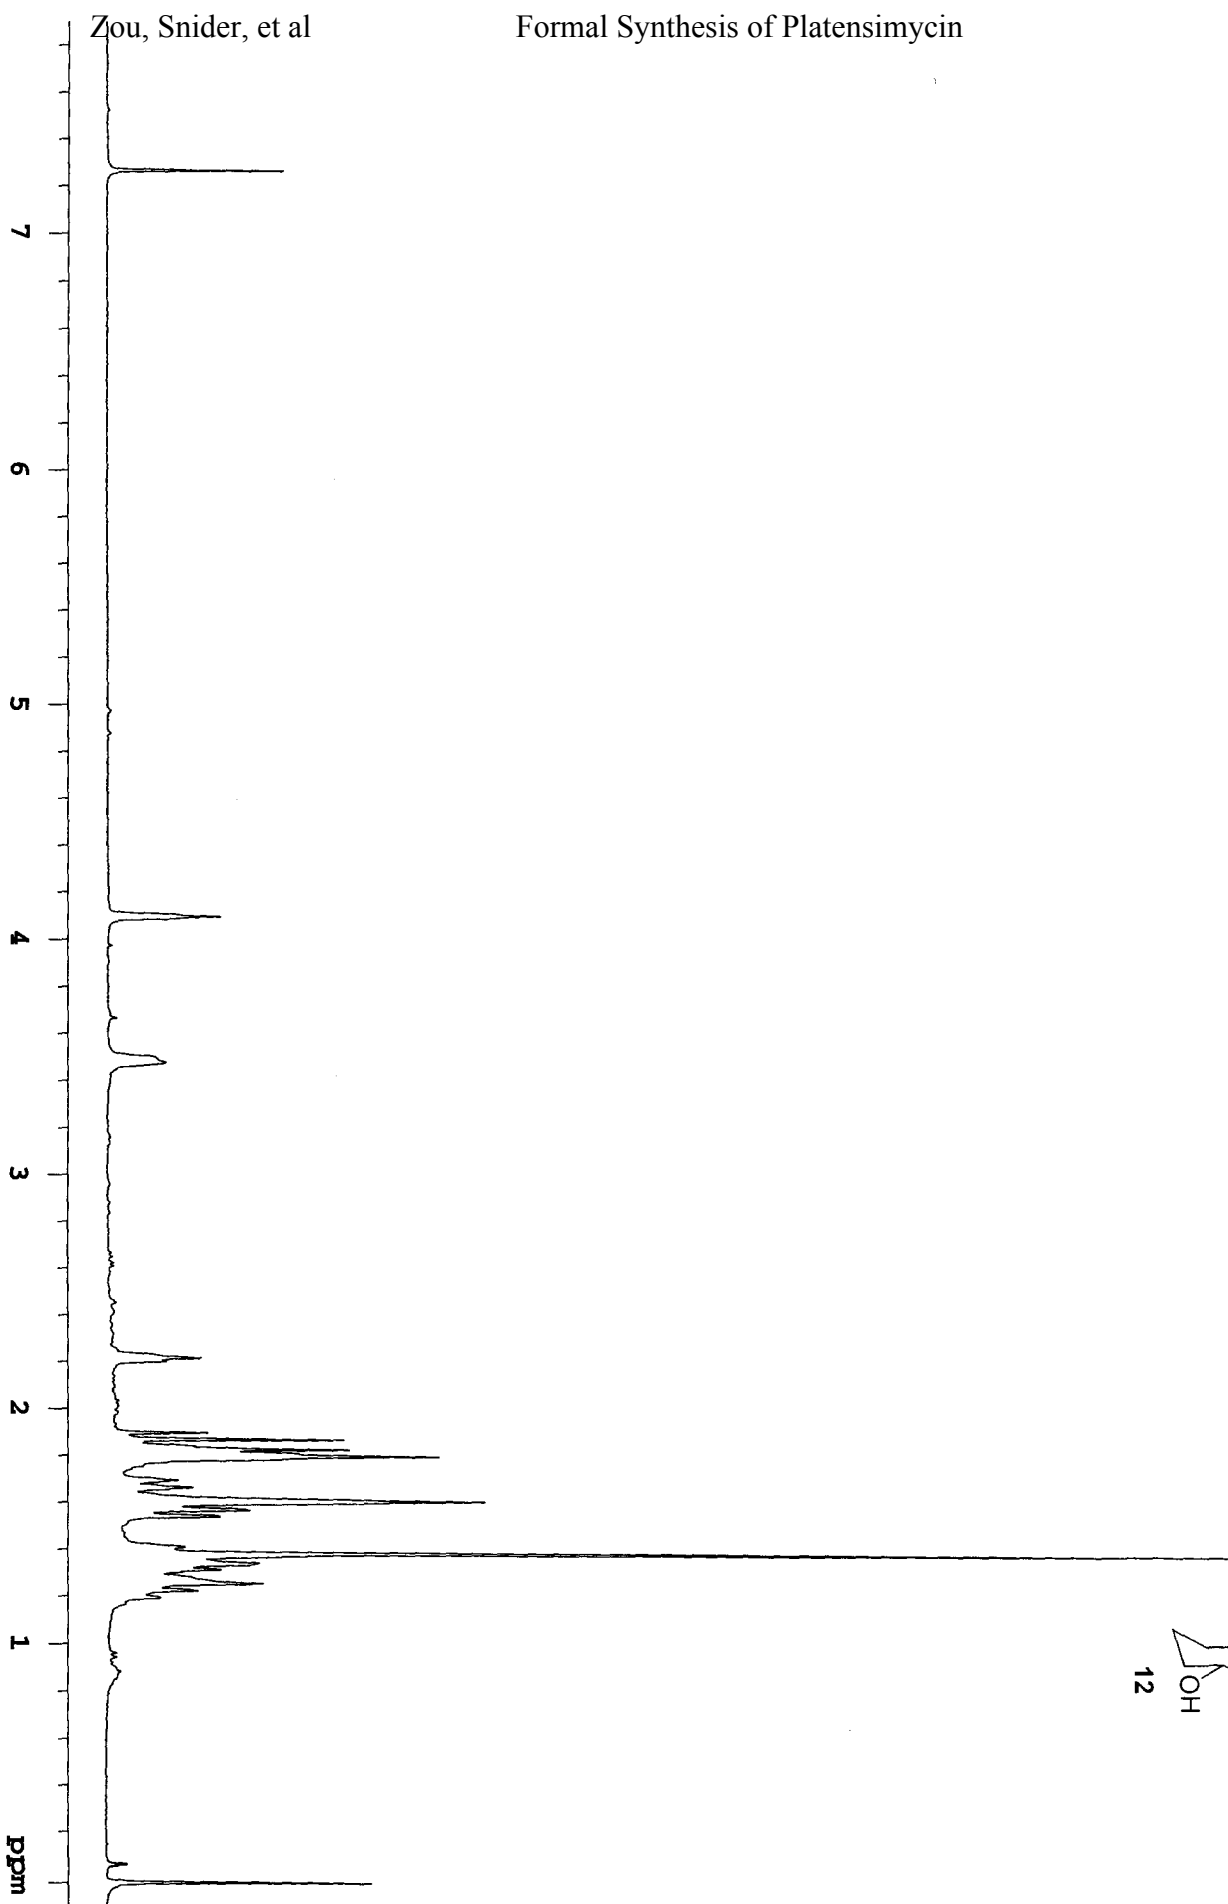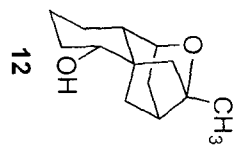

| INDEX | FREQUENCY | PPM    | HEIGHT |
|-------|-----------|--------|--------|
| 1     | 8587.514  | 85.433 | 19.6   |
| 2     | 8017.599  | 79.763 | 58.2   |
| 3     | 7771.932  | 77.319 | 137.6  |
| 4     | 7739.889  | 77.000 | 139.2  |
| 5     | 7707.845  | 76.681 | 141.0  |
| 6     | 7288.229  | 72.507 | 49.9   |
| 7     | 5024.587  | 49.987 | 27.4   |
| 8     | 4871.999  | 48.469 | 63.4   |
| 9     | 4501.211  | 44.780 | 63.3   |
| 10    | 4450.857  | 44.279 | 56.9   |
| 11    | 3861.105  | 38.412 | 63.0   |
| 12    | 3349.935  | 33.327 | 65.5   |
| 13    | 3230.154  | 32.135 | 67.0   |
| 14    | 2512.991  | 25.000 | 66.3   |
| 15    | 2413.045  | 24.006 | 62.9   |
| 16    | 2353.536  | 23.414 | 70.8   |

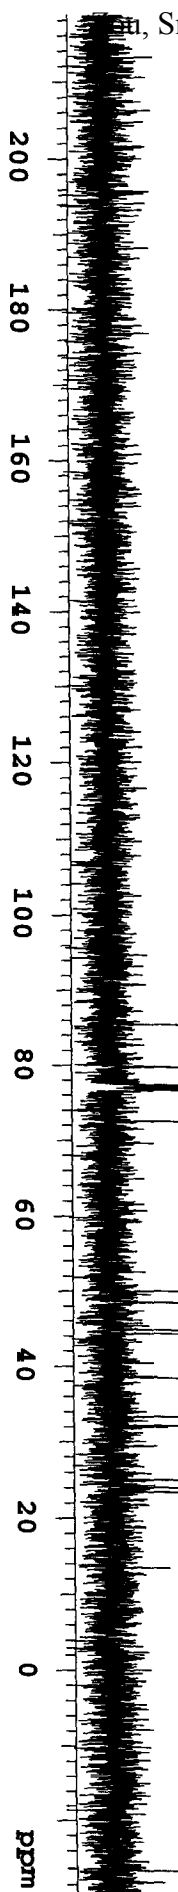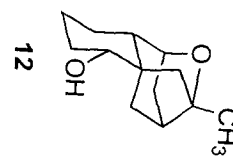

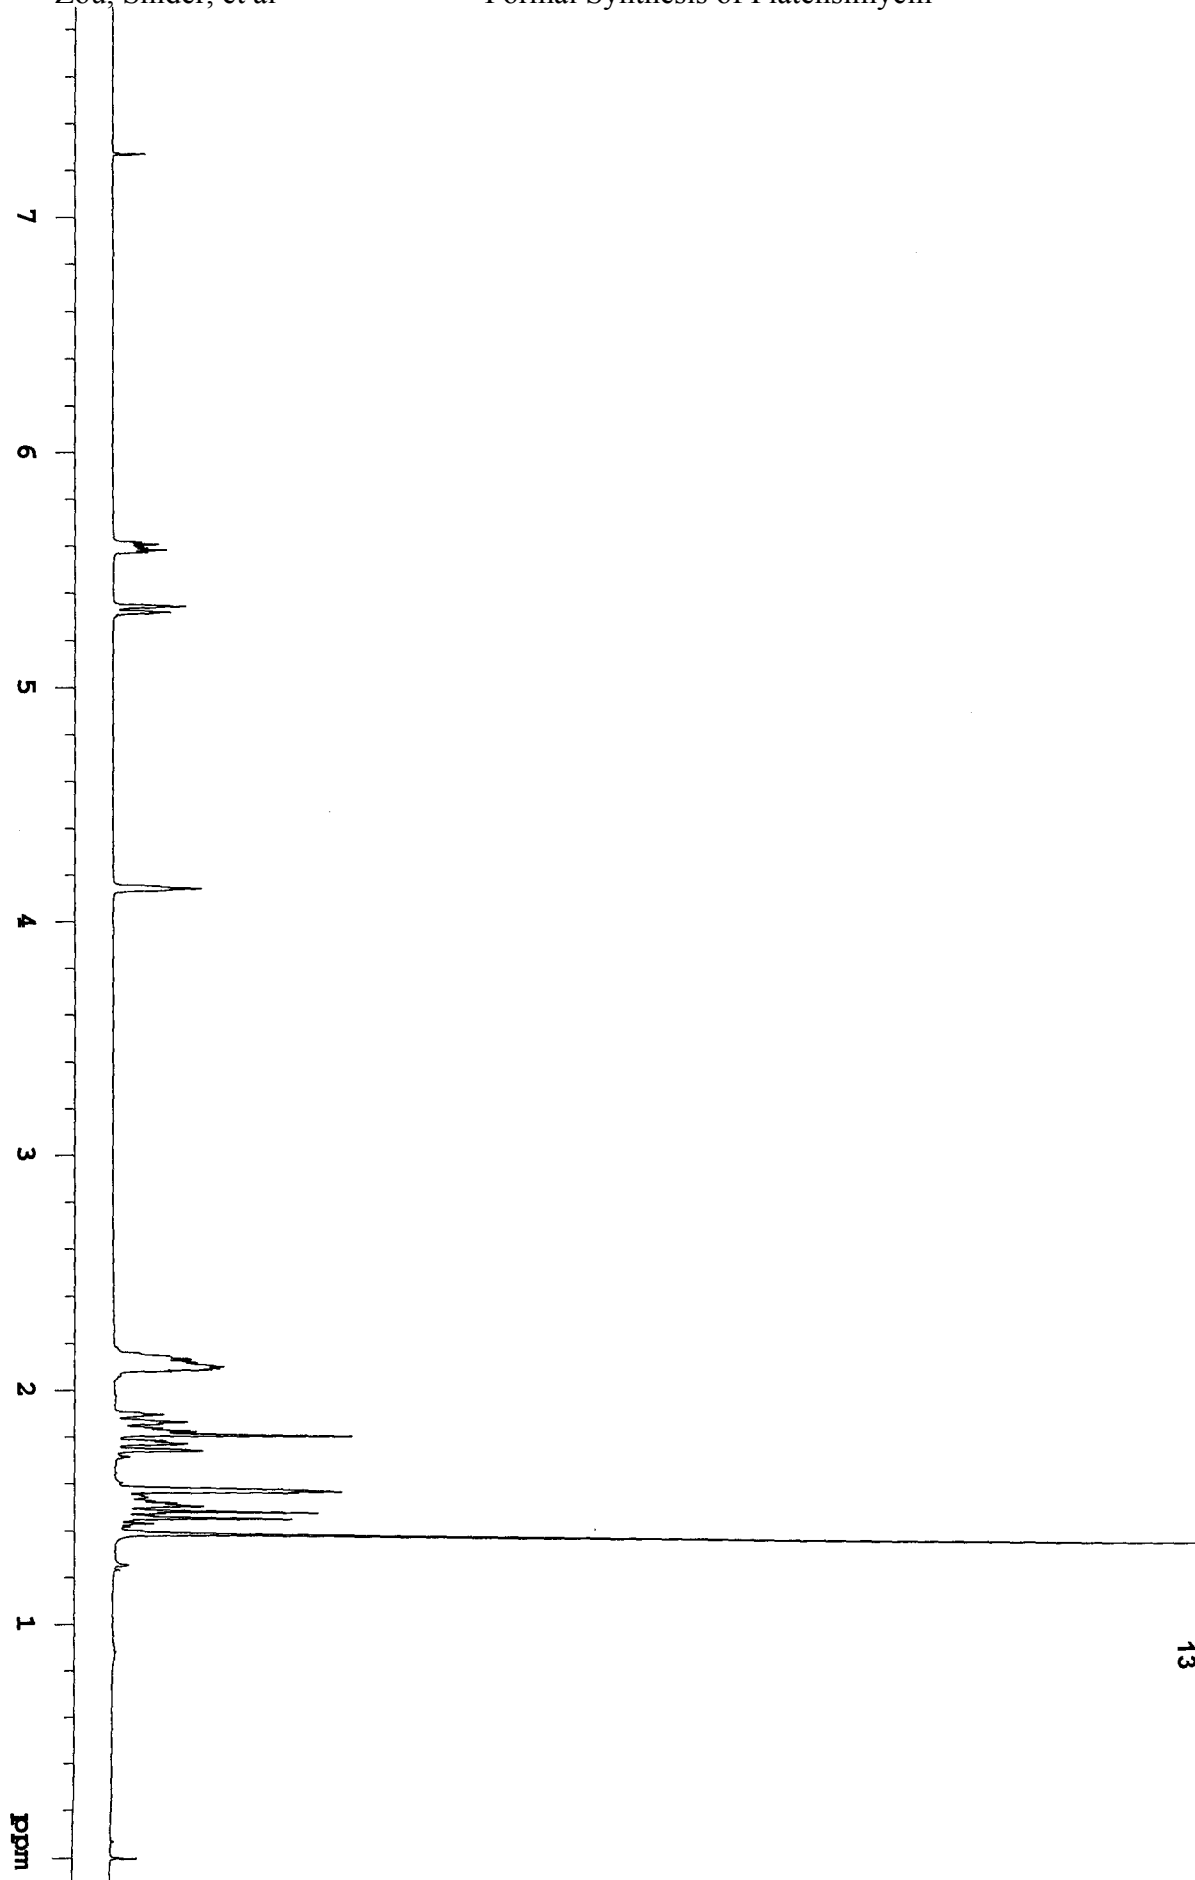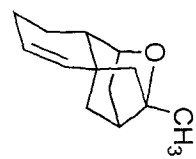

| INDEX | FREQUENCY | PPM     | HEIGHT |
|-------|-----------|---------|--------|
| 1     | 13387.929 | 133.189 | 64.0   |
| 2     | 12741.720 | 126.761 | 62.4   |
| 3     | 8717.977  | 86.730  | 34.0   |
| 4     | 8101.522  | 80.598  | 55.2   |
| 5     | 7771.932  | 77.319  | 70.8   |
| 6     | 7739.889  | 77.000  | 74.3   |
| 7     | 7707.845  | 76.681  | 75.5   |
| 8     | 5294.668  | 52.674  | 75.2   |
| 9     | 4580.556  | 45.569  | 40.2   |
| 10    | 4509.603  | 44.864  | 74.8   |
| 11    | 4481.374  | 44.583  | 74.0   |
| 12    | 4373.800  | 43.513  | 68.1   |
| 13    | 3851.186  | 38.313  | 91.4   |
| 14    | 2637.350  | 26.238  | 81.5   |
| 15    | 2345.144  | 23.331  | 80.9   |
| 16    | 2232.992  | 22.215  | 65.3   |

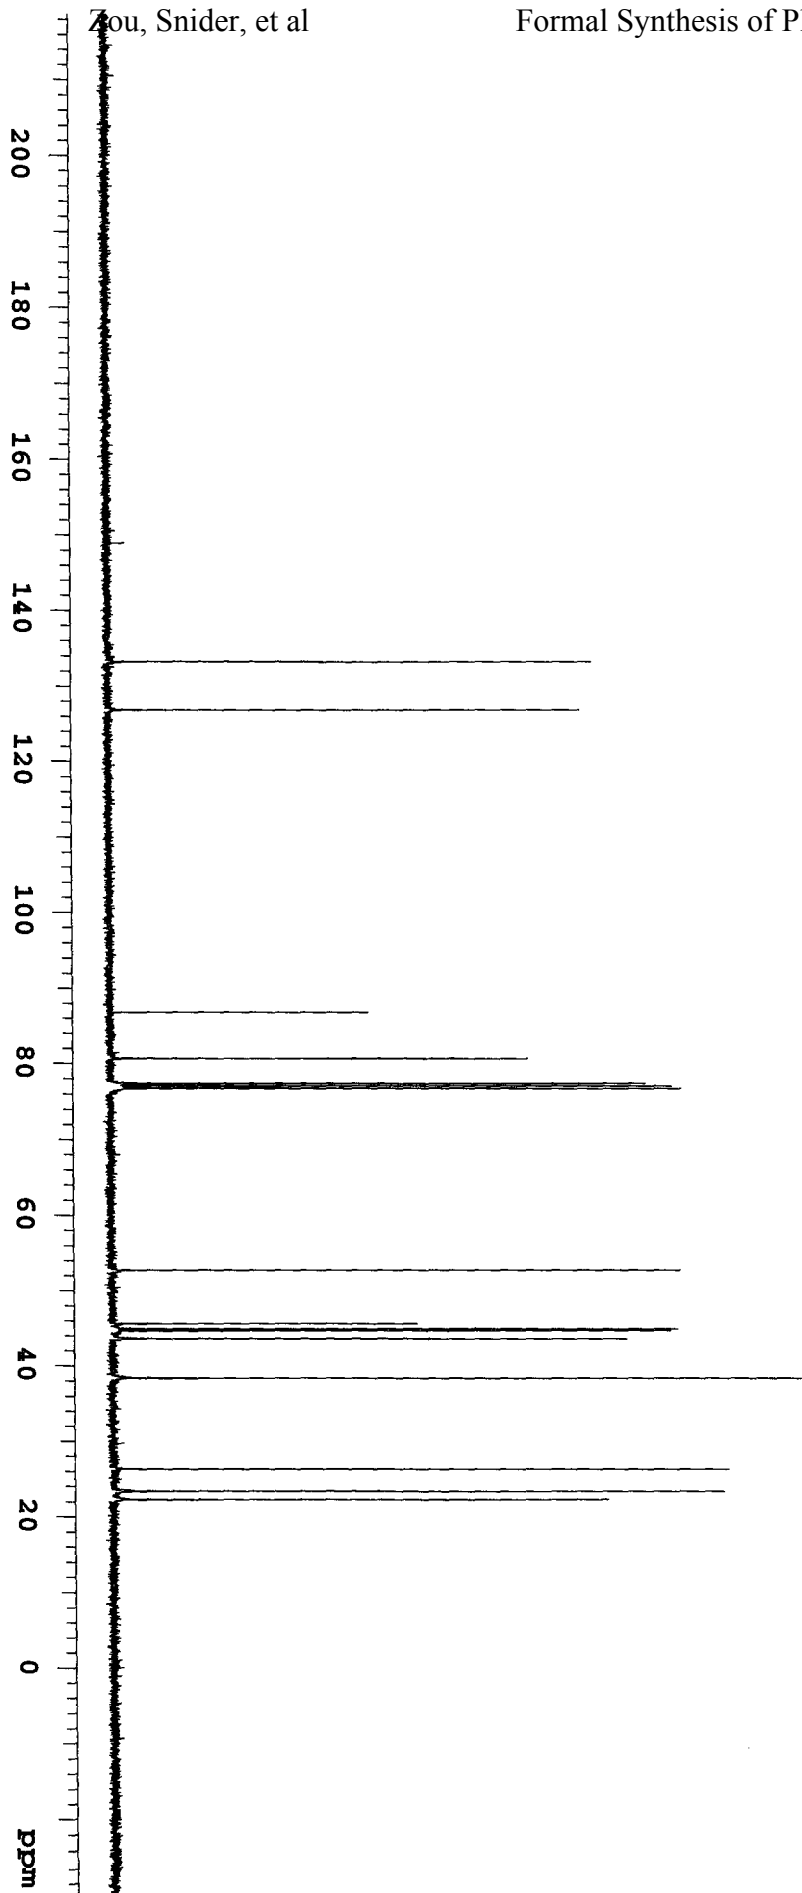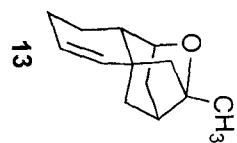

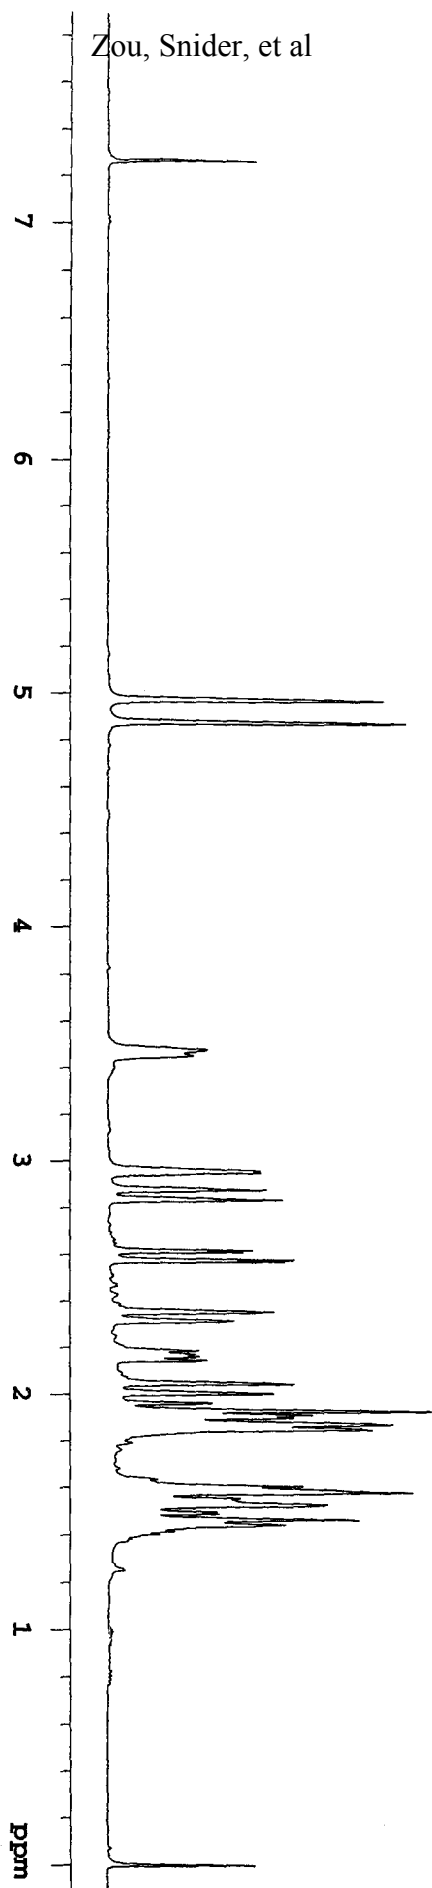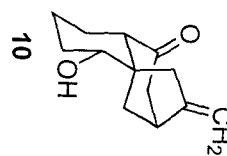

| INDEX | FREQUENCY | PPM     | HEIGHT |
|-------|-----------|---------|--------|
| 1     | 21416.341 | 213.060 | 14.5   |
| 2     | 15232.717 | 151.542 | 18.2   |
| 3     | 10855.733 | 107.998 | 55.7   |
| 4     | 7771.932  | 77.319  | 123.3  |
| 5     | 7739.889  | 77.000  | 122.7  |
| 6     | 7708.608  | 76.689  | 122.9  |
| 7     | 7202.016  | 71.649  | 47.2   |
| 8     | 5990.468  | 59.596  | 54.3   |
| 9     | 4970.418  | 49.448  | 27.8   |
| 10    | 4933.797  | 49.084  | 60.3   |
| 11    | 4249.441  | 42.275  | 55.0   |
| 12    | 4057.943  | 40.370  | 55.5   |
| 13    | 3208.791  | 31.923  | 63.1   |
| 14    | 2955.495  | 29.403  | 62.5   |
| 15    | 2726.613  | 27.126  | 66.0   |
| 16    | 2435.171  | 24.226  | 62.9   |

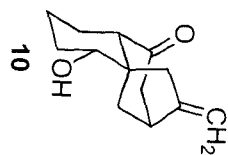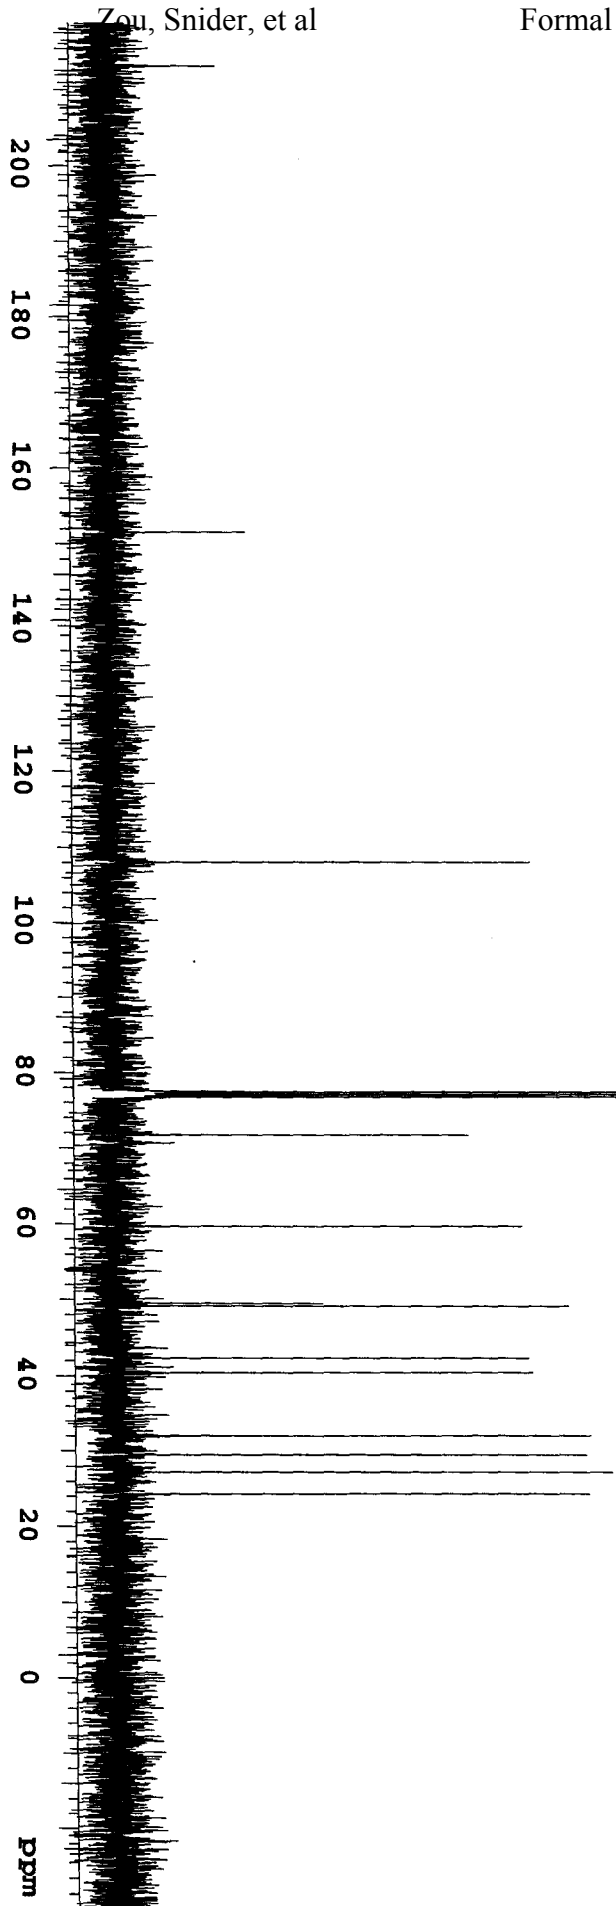

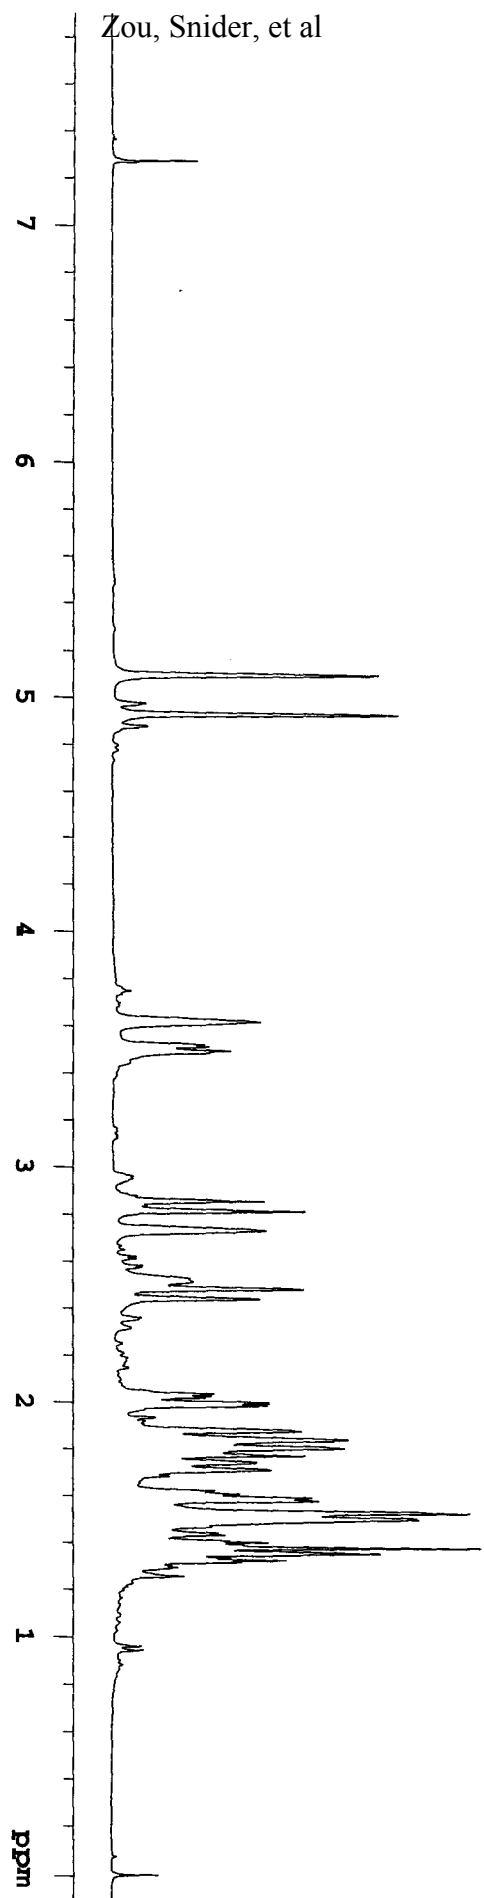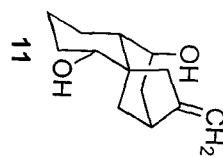

| INDEX | FREQUENCY | PPM     | HEIGHT |
|-------|-----------|---------|--------|
| 1     | 15639.364 | 155.588 | 22.4   |
| 2     | 10691.701 | 106.366 | 66.3   |
| 3     | 7771.932  | 77.319  | 113.8  |
| 4     | 7739.889  | 77.000  | 122.1  |
| 5     | 7707.845  | 76.681  | 121.6  |
| 6     | 7327.139  | 72.894  | 56.4   |
| 7     | 7320.272  | 72.825  | 50.0   |
| 8     | 5032.980  | 50.070  | 61.1   |
| 9     | 4882.681  | 48.575  | 23.4   |
| 10    | 4199.087  | 41.774  | 60.7   |
| 11    | 4080.831  | 40.598  | 71.2   |
| 12    | 3957.998  | 39.376  | 72.5   |
| 13    | 3224.050  | 32.074  | 72.8   |
| 14    | 2981.435  | 29.661  | 69.2   |
| 15    | 2797.567  | 27.831  | 67.3   |
| 16    | 2423.727  | 24.112  | 66.9   |

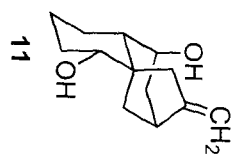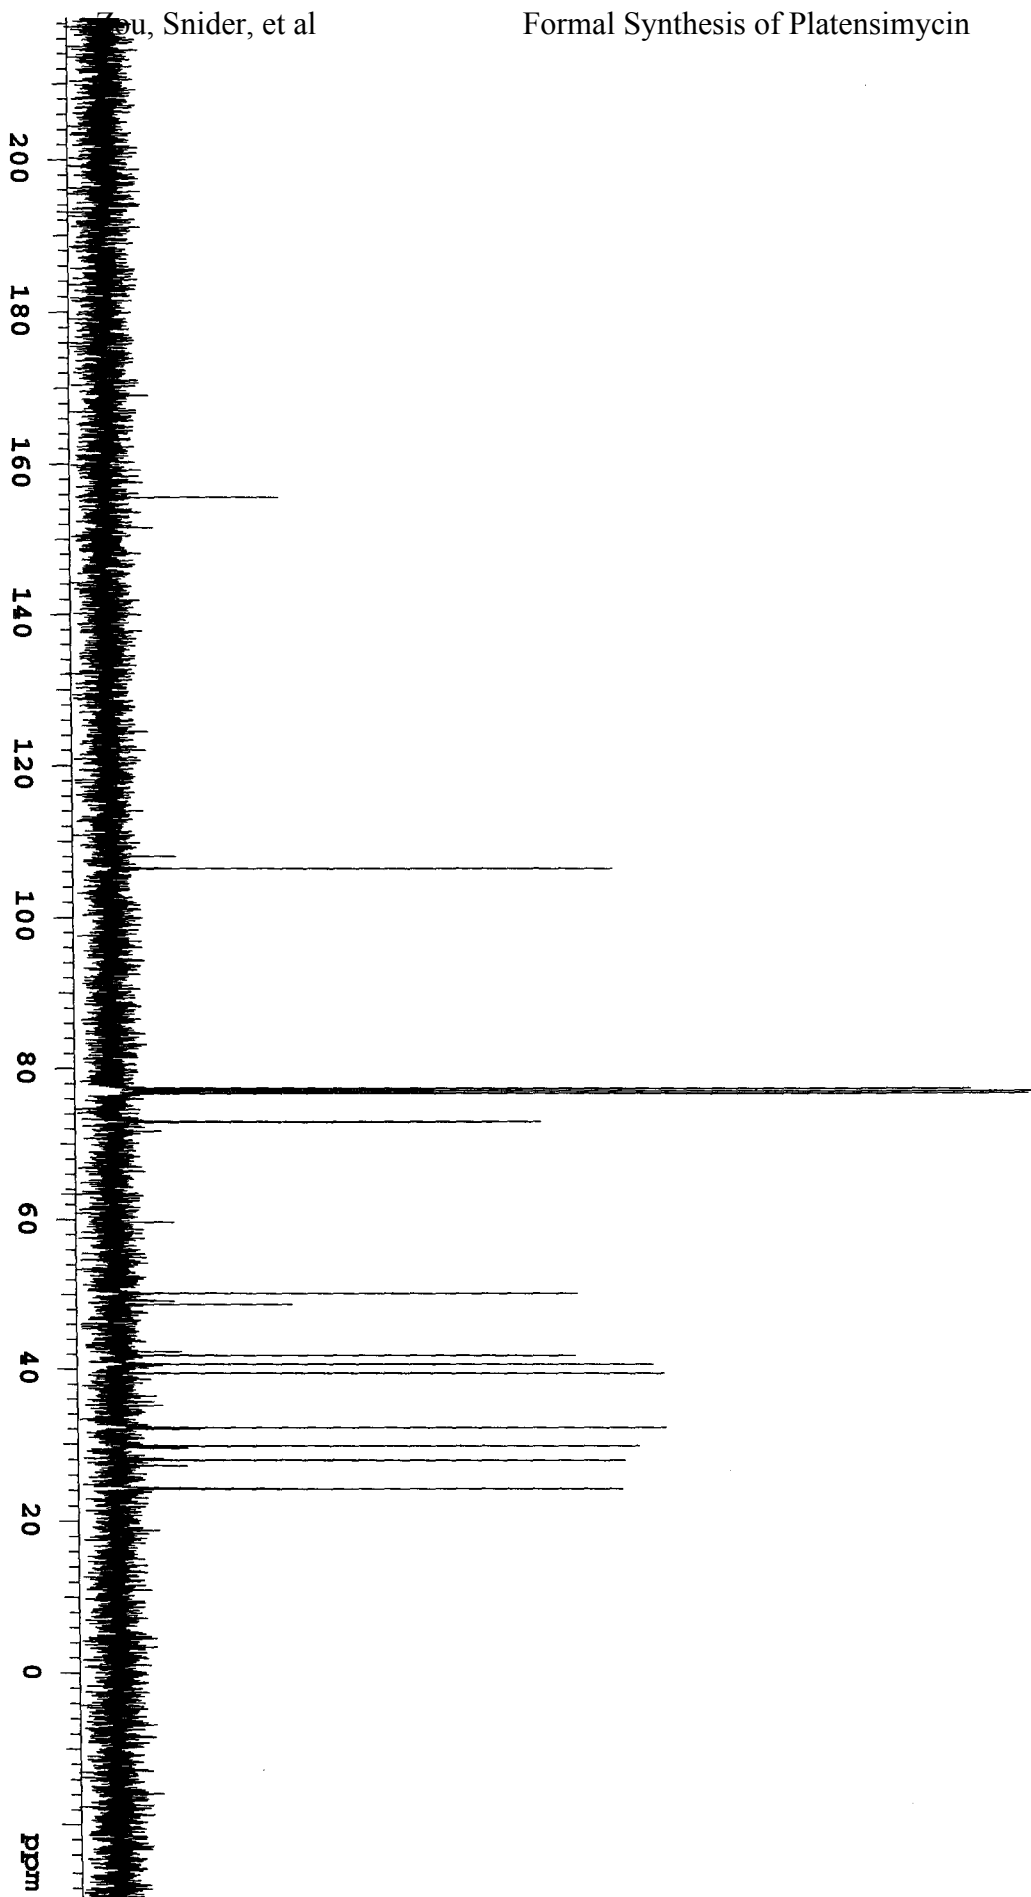



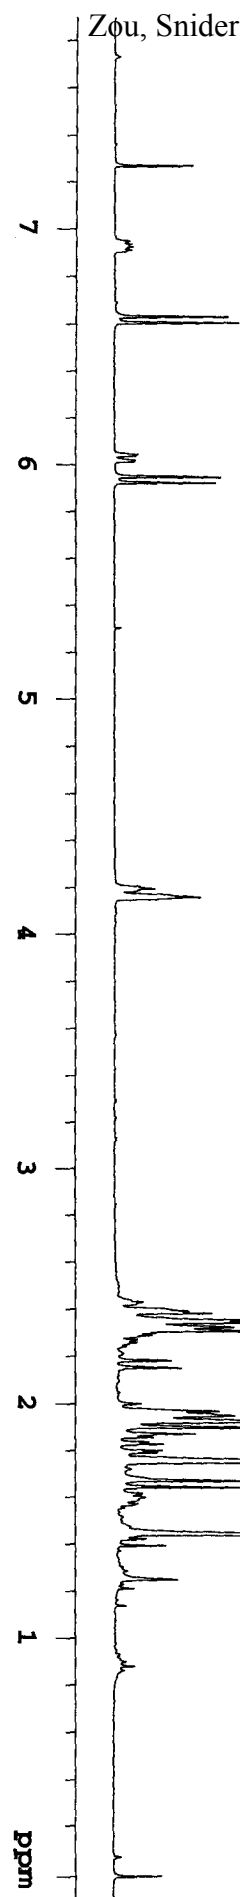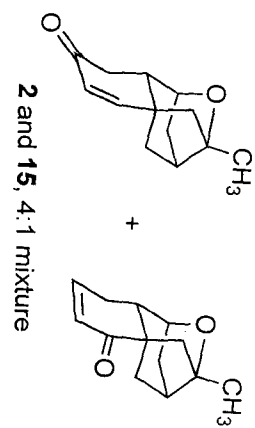

## Formal Synthesis of Platensimycin

H. Snider, et al

| INDEX | FREQUENCY | PPM     | HEIGHT |
|-------|-----------|---------|--------|
| 1     | 20172.750 | 200.688 | 8.9    |
| 2     | 20014.059 | 199.109 | 31.9   |
| 3     | 15599.691 | 155.193 | 68.6   |
| 4     | 14845.144 | 147.686 | 28.0   |
| 5     | 12996.542 | 129.296 | 33.1   |
| 6     | 12950.002 | 128.833 | 77.5   |
| 7     | 8746.206  | 87.011  | 45.3   |
| 8     | 8676.778  | 86.321  | 21.6   |
| 9     | 7936.727  | 78.958  | 69.6   |
| 10    | 7892.477  | 78.518  | 33.8   |
| 11    | 7771.932  | 77.319  | 284.8  |
| 12    | 7739.889  | 77.000  | 284.0  |
| 13    | 7708.608  | 76.689  | 280.5  |
| 14    | 5403.005  | 53.752  | 22.2   |
| 15    | 5190.145  | 51.634  | 81.6   |
| 16    | 4727.041  | 47.027  | 37.7   |
| 17    | 4641.592  | 46.177  | 53.8   |
| 18    | 4469.167  | 44.461  | 35.3   |
| 19    | 4434.072  | 44.112  | 102.2  |
| 20    | 4289.114  | 42.670  | 87.0   |
| 21    | 4241.811  | 42.200  | 95.9   |
| 22    | 4180.013  | 41.585  | 43.8   |
| 23    | 4132.711  | 41.114  | 43.4   |
| 24    | 3851.949  | 38.321  | 44.6   |
| 25    | 3809.988  | 37.904  | 92.7   |
| 26    | 3761.922  | 37.425  | 104.2  |
| 27    | 2982.198  | 29.668  | 8.3    |
| 28    | 2652.608  | 26.389  | 46.0   |
| 29    | 2321.493  | 23.095  | 102.0  |
| 30    | 2316.915  | 23.050  | 42.0   |

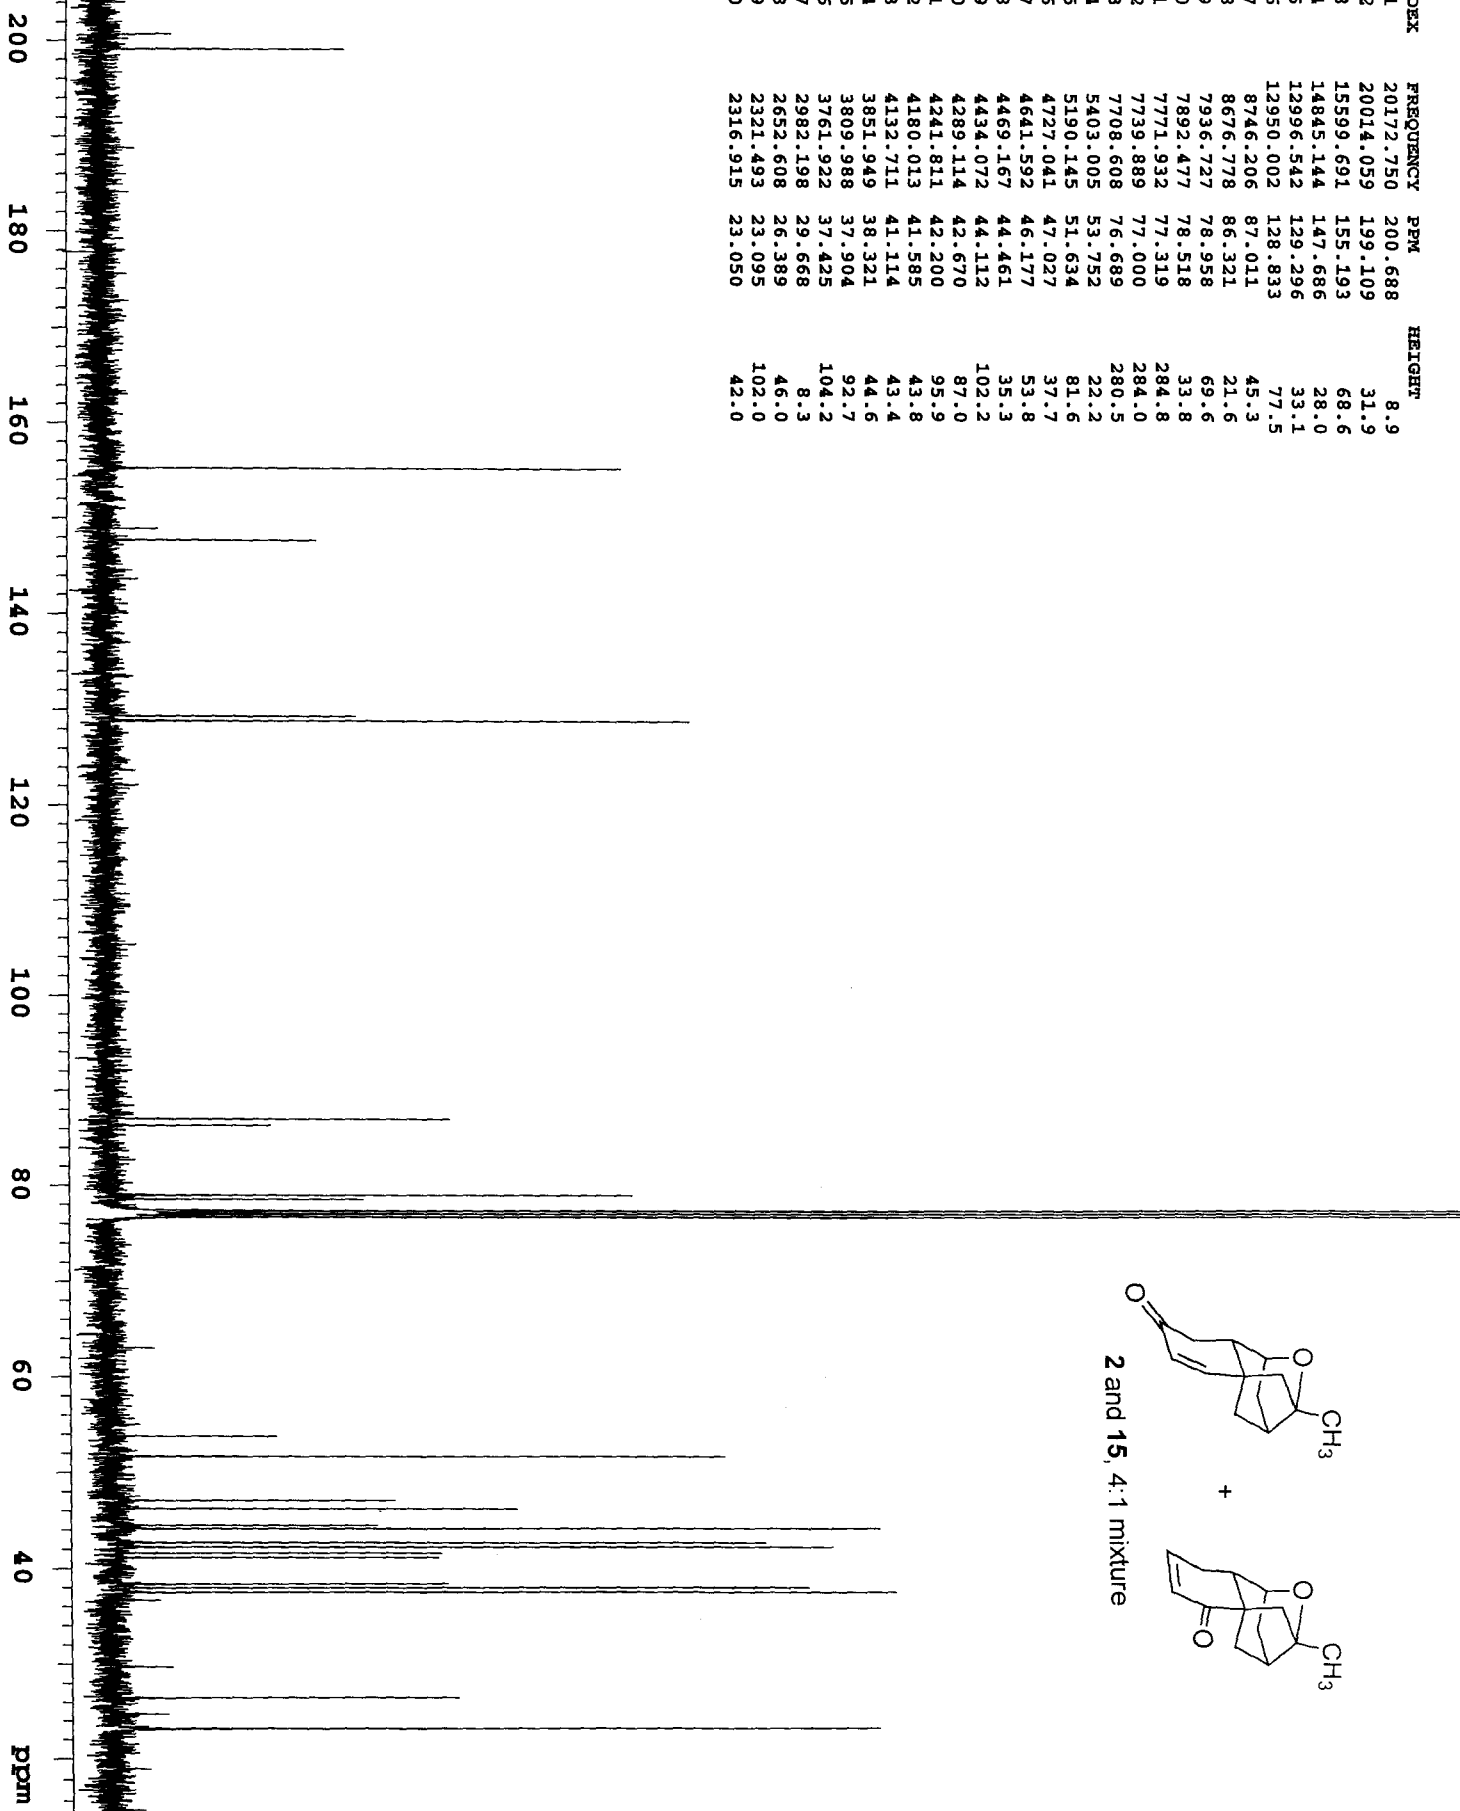

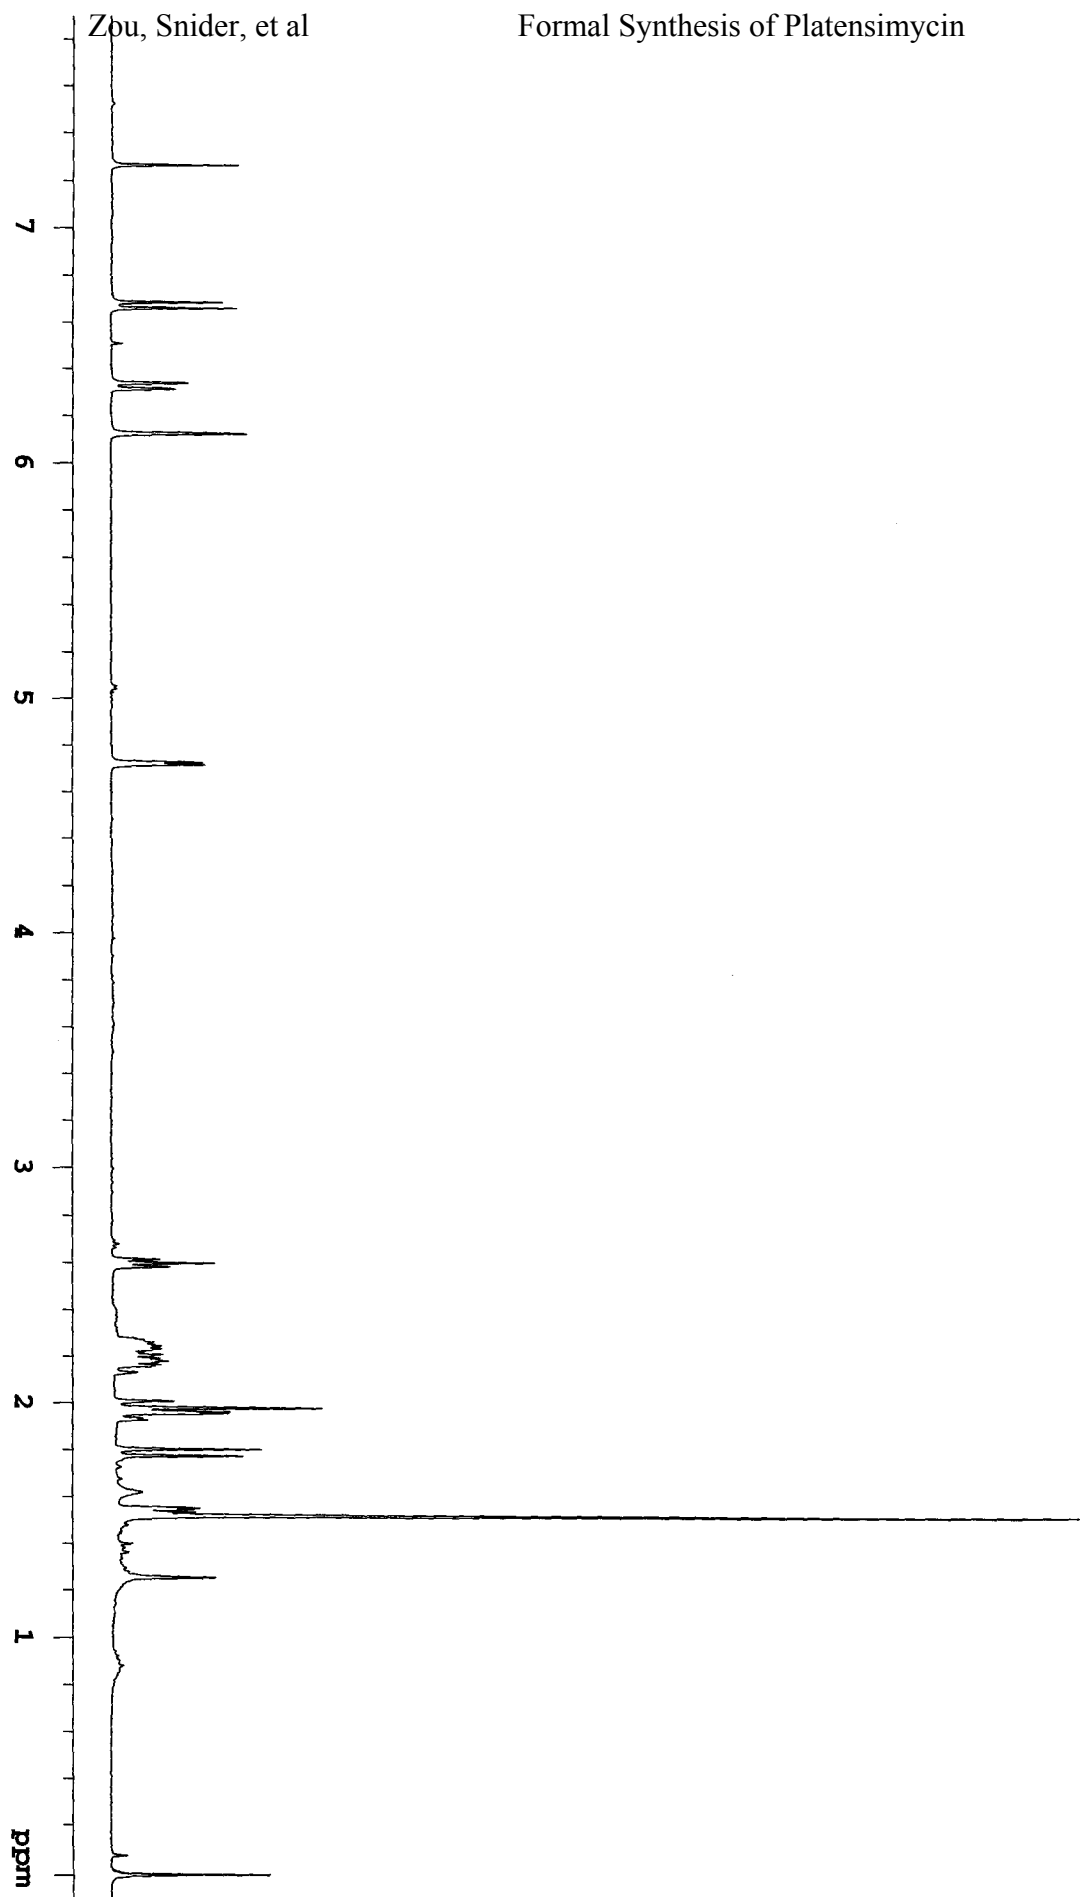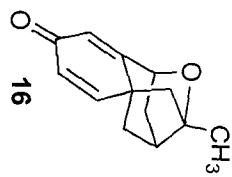

| INDEX | FREQUENCY | PPM     | HEIGHT |
|-------|-----------|---------|--------|
| 1     | 18808.614 | 187.117 | 16.6   |
| 2     | 16129.934 | 160.468 | 13.8   |
| 3     | 15174.734 | 150.965 | 51.0   |
| 4     | 13067.495 | 130.001 | 49.7   |
| 5     | 12246.572 | 121.835 | 48.7   |
| 6     | 8754.598  | 87.095  | 31.2   |
| 7     | 8038.961  | 79.975  | 53.8   |
| 8     | 7771.932  | 77.319  | 166.2  |
| 9     | 7739.889  | 77.000  | 172.9  |
| 10    | 7707.845  | 76.681  | 171.1  |
| 11    | 5507.528  | 54.791  | 62.2   |
| 12    | 5014.669  | 49.888  | 21.3   |
| 13    | 4886.495  | 48.613  | 61.1   |
| 14    | 4457.723  | 44.347  | 58.6   |
| 15    | 4273.855  | 42.518  | 62.5   |
| 16    | 2232.229  | 22.207  | 61.3   |

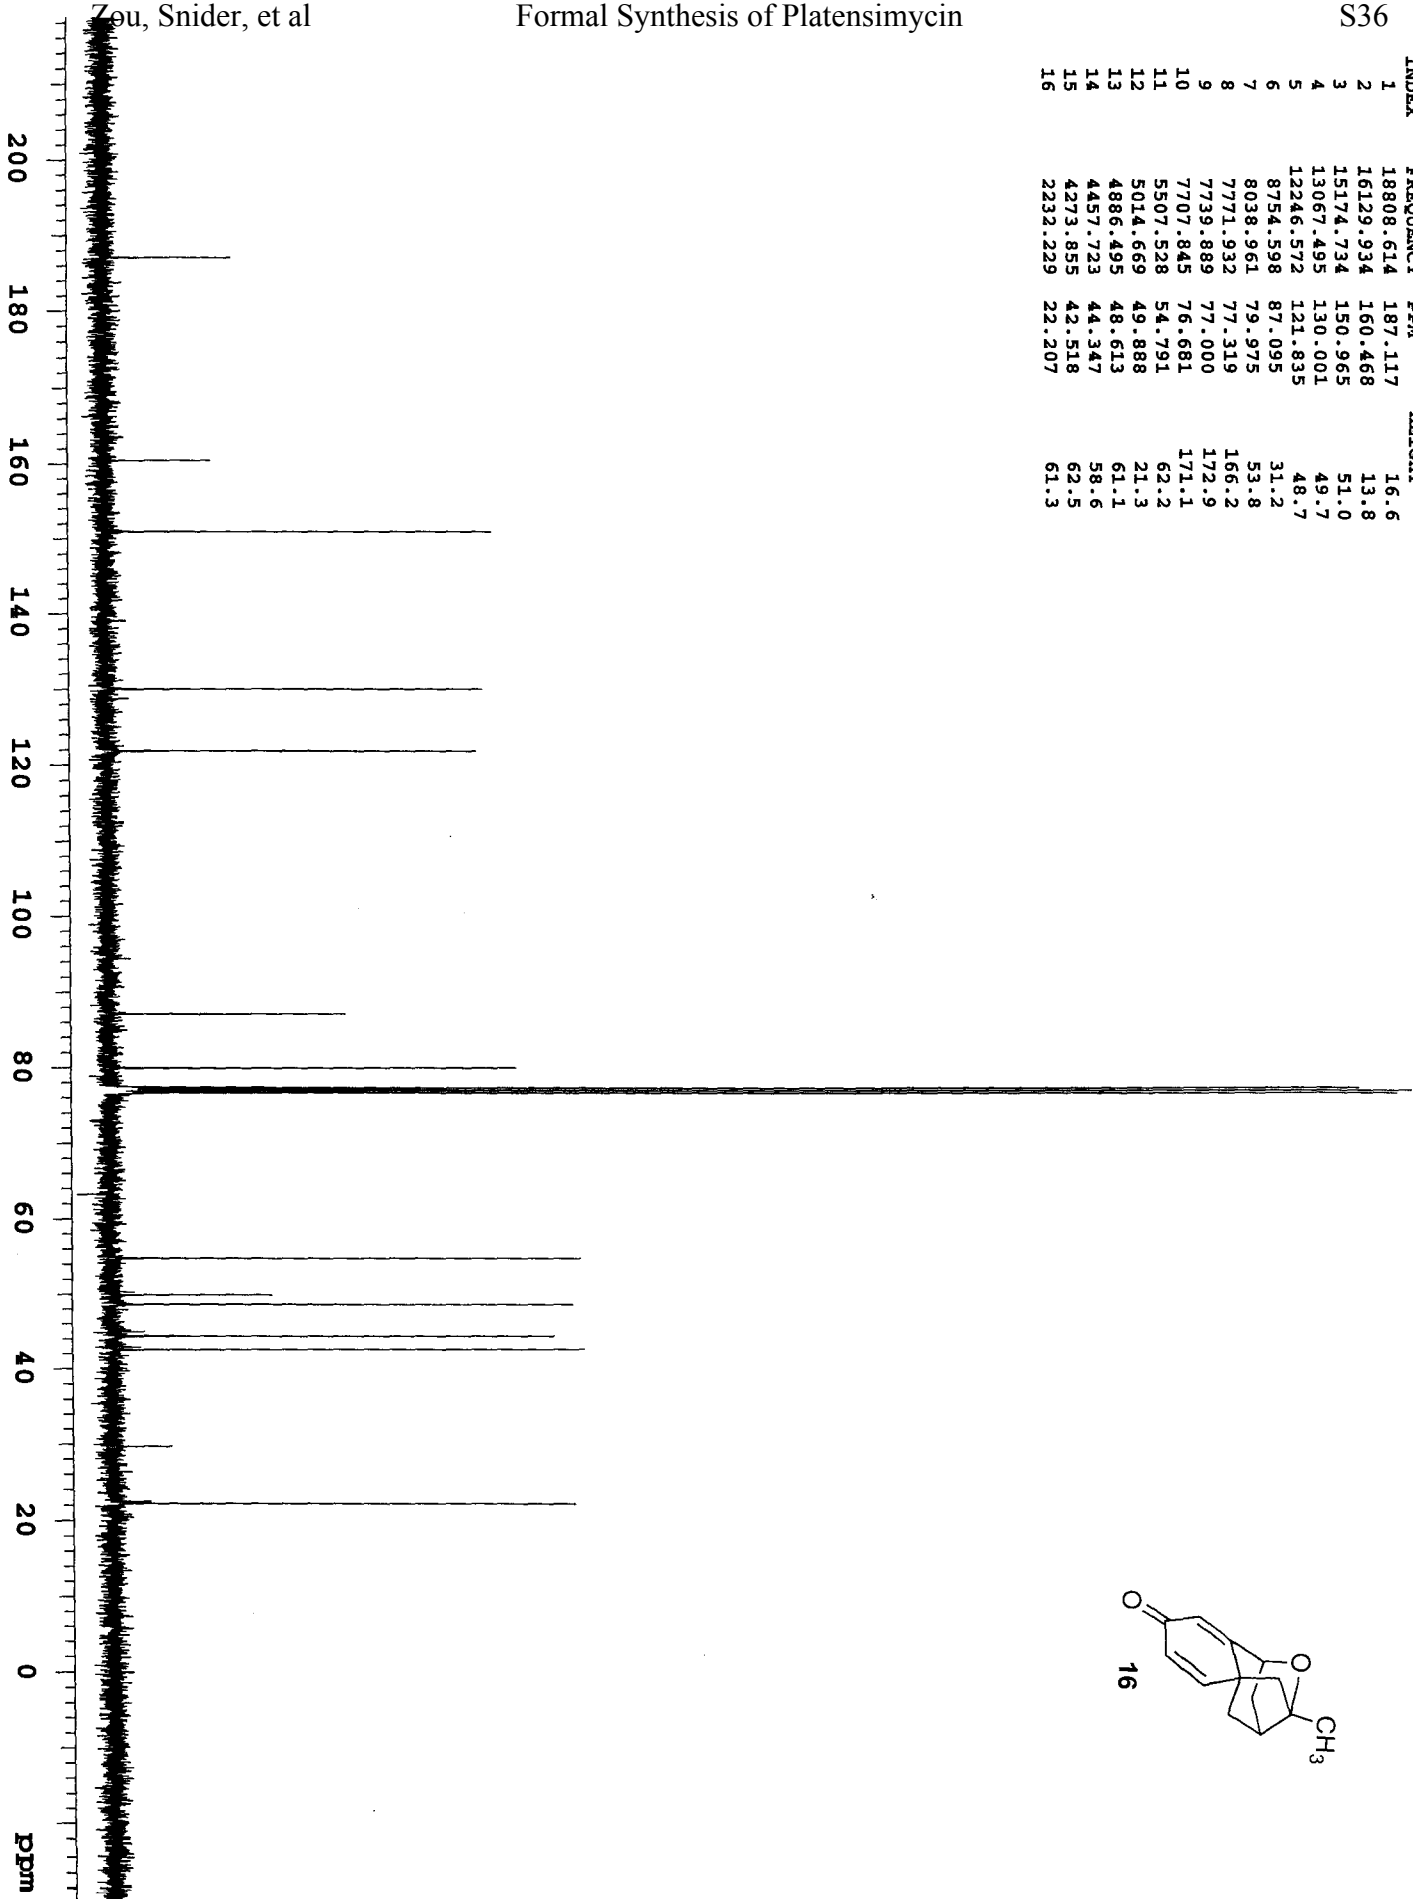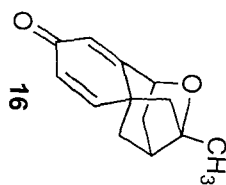

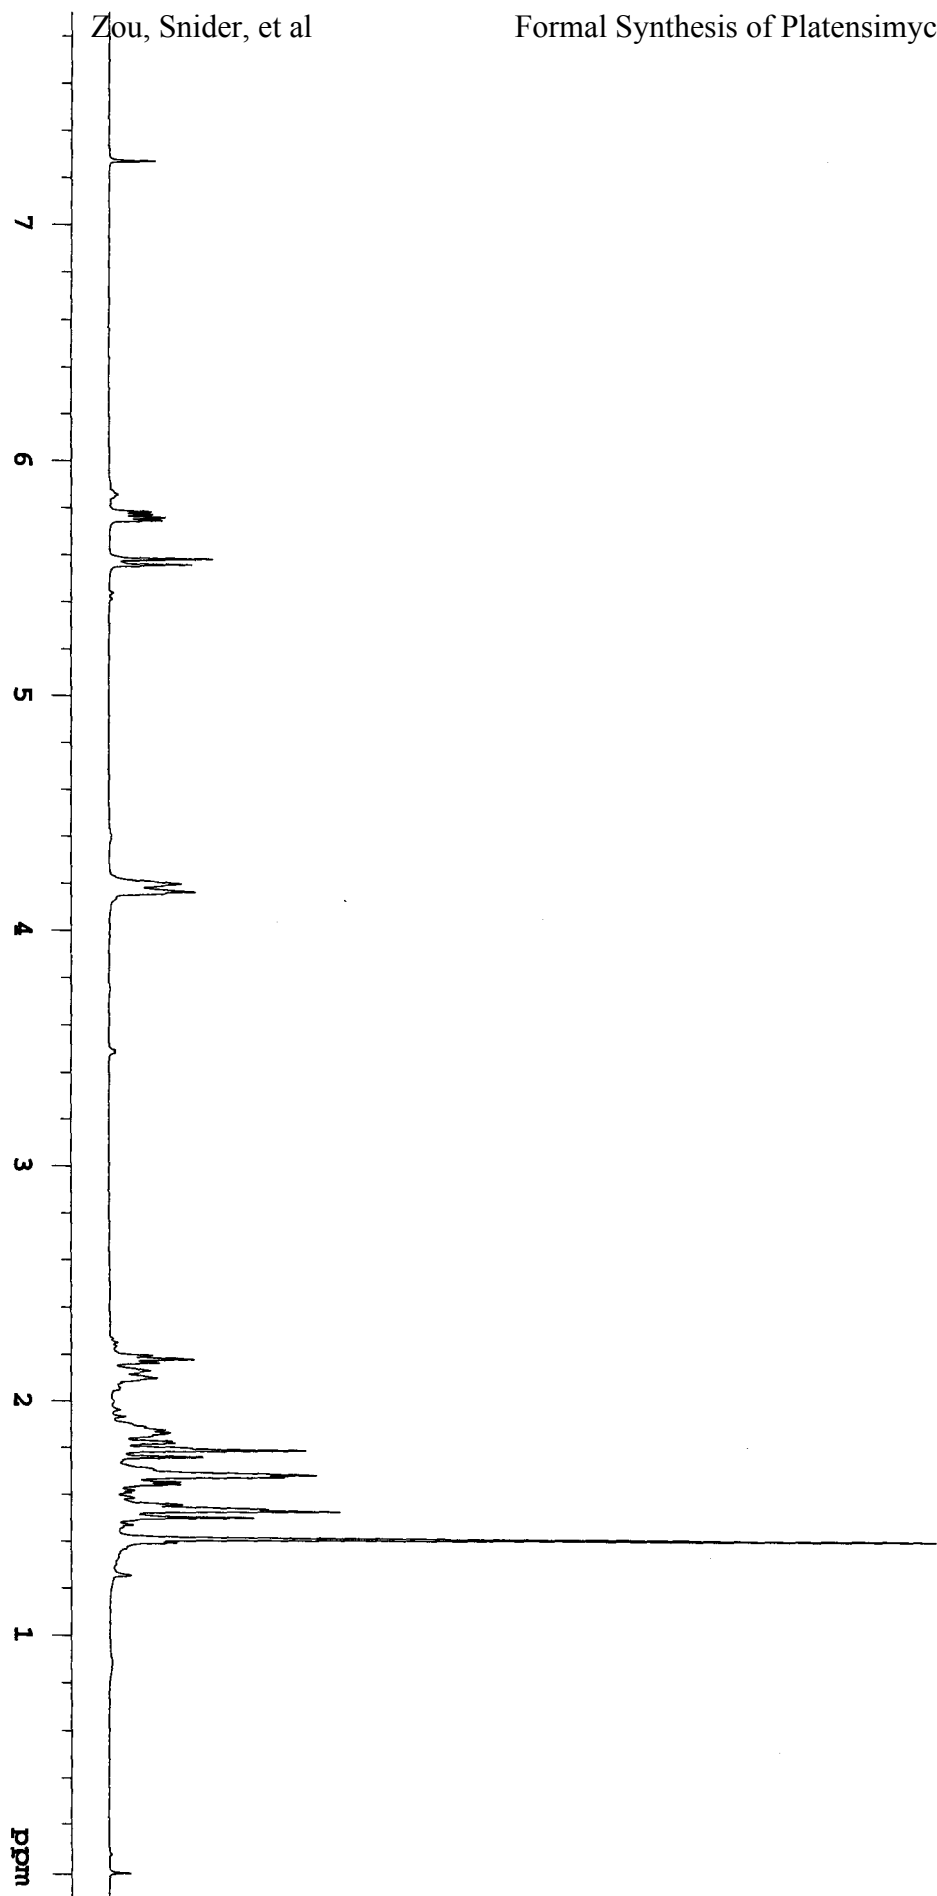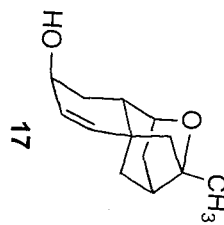

| INDEX | FREQUENCY | PPM     | HEIGHT |
|-------|-----------|---------|--------|
| 1     | 13815.938 | 137.447 | 66.2   |
| 2     | 12818.014 | 127.520 | 62.4   |
| 3     | 8717.214  | 86.723  | 26.4   |
| 4     | 8064.138  | 80.226  | 70.7   |
| 5     | 7771.932  | 77.319  | 155.4  |
| 6     | 7739.889  | 77.000  | 171.5  |
| 7     | 7707.845  | 76.681  | 167.5  |
| 8     | 6461.965  | 64.287  | 74.1   |
| 9     | 5245.077  | 52.180  | 72.6   |
| 10    | 4601.919  | 45.782  | 31.9   |
| 11    | 4447.805  | 44.249  | 78.4   |
| 12    | 4297.506  | 42.754  | 82.5   |
| 13    | 3818.380  | 37.987  | 82.5   |
| 14    | 3792.440  | 37.729  | 74.3   |
| 15    | 3140.890  | 31.247  | 83.7   |
| 16    | 2334.463  | 23.224  | 77.6   |

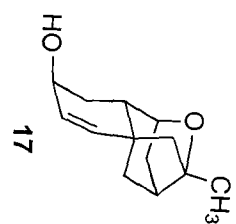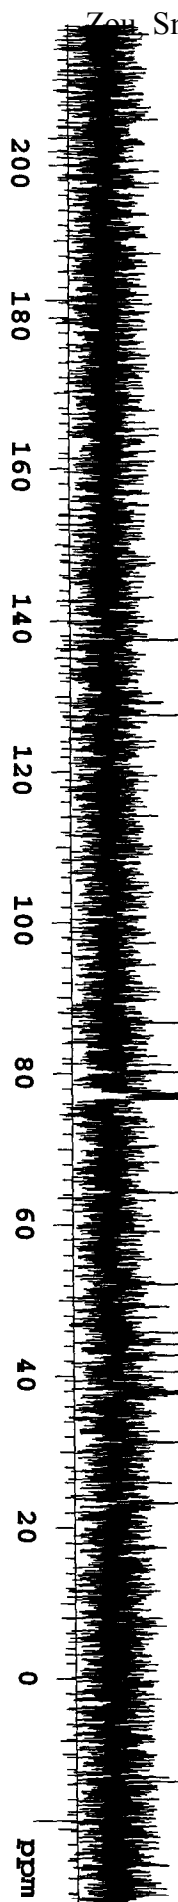

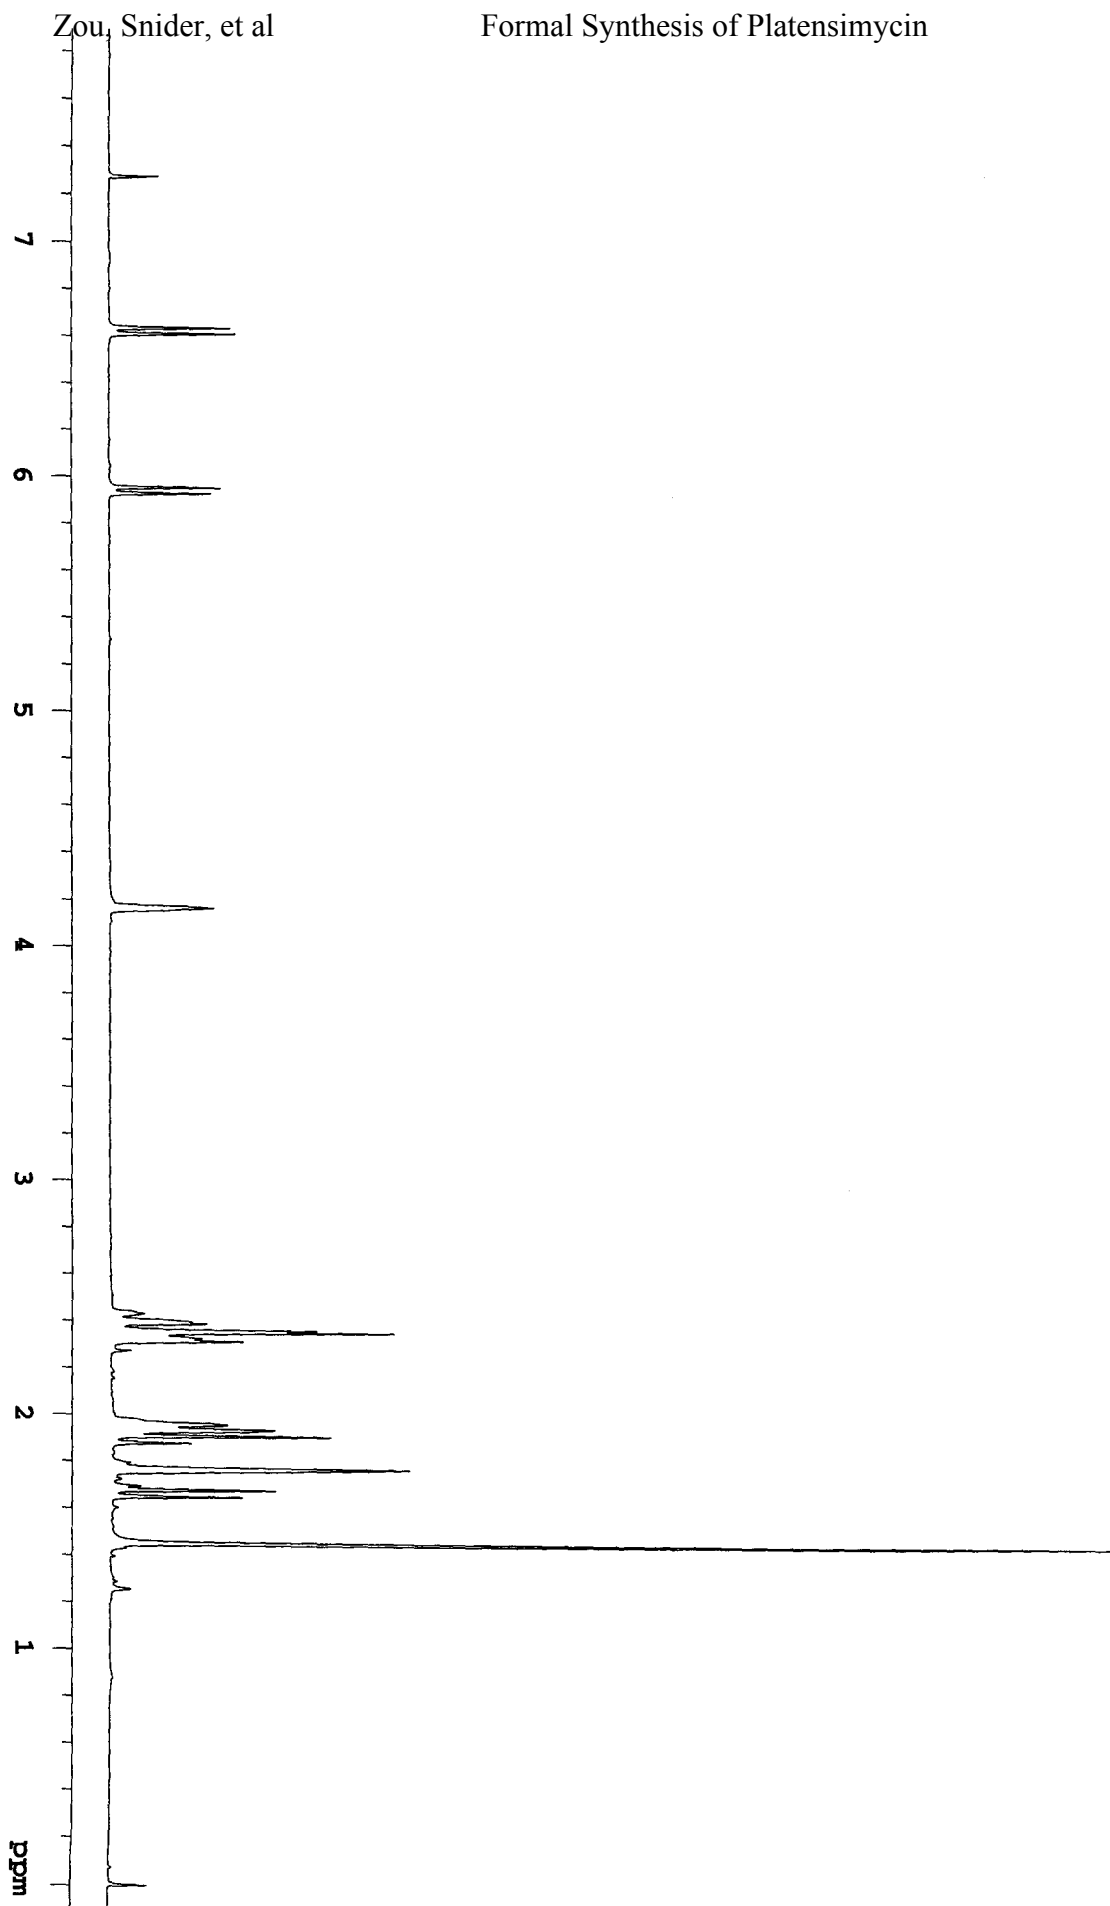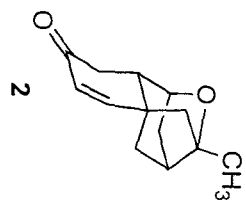

| INDEX | FREQUENCY | PPM     | HEIGHT |
|-------|-----------|---------|--------|
| 1     | 20011.770 | 199.086 | 19.8   |
| 2     | 15598.165 | 155.178 | 49.4   |
| 3     | 12949.239 | 128.825 | 52.6   |
| 4     | 8744.680  | 86.996  | 22.3   |
| 5     | 7935.201  | 78.943  | 55.1   |
| 6     | 7771.932  | 77.319  | 106.9  |
| 7     | 7739.889  | 77.000  | 112.8  |
| 8     | 7707.845  | 76.681  | 112.9  |
| 9     | 5189.382  | 51.626  | 59.4   |
| 10    | 4640.829  | 46.169  | 28.9   |
| 11    | 4433.309  | 44.105  | 64.7   |
| 12    | 4288.351  | 42.662  | 63.5   |
| 13    | 4241.048  | 42.192  | 66.2   |
| 14    | 3809.225  | 37.896  | 72.7   |
| 15    | 3761.160  | 37.418  | 67.3   |
| 16    | 2320.730  | 23.088  | 67.8   |

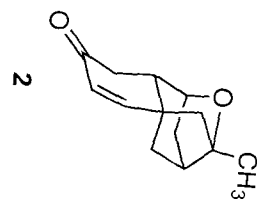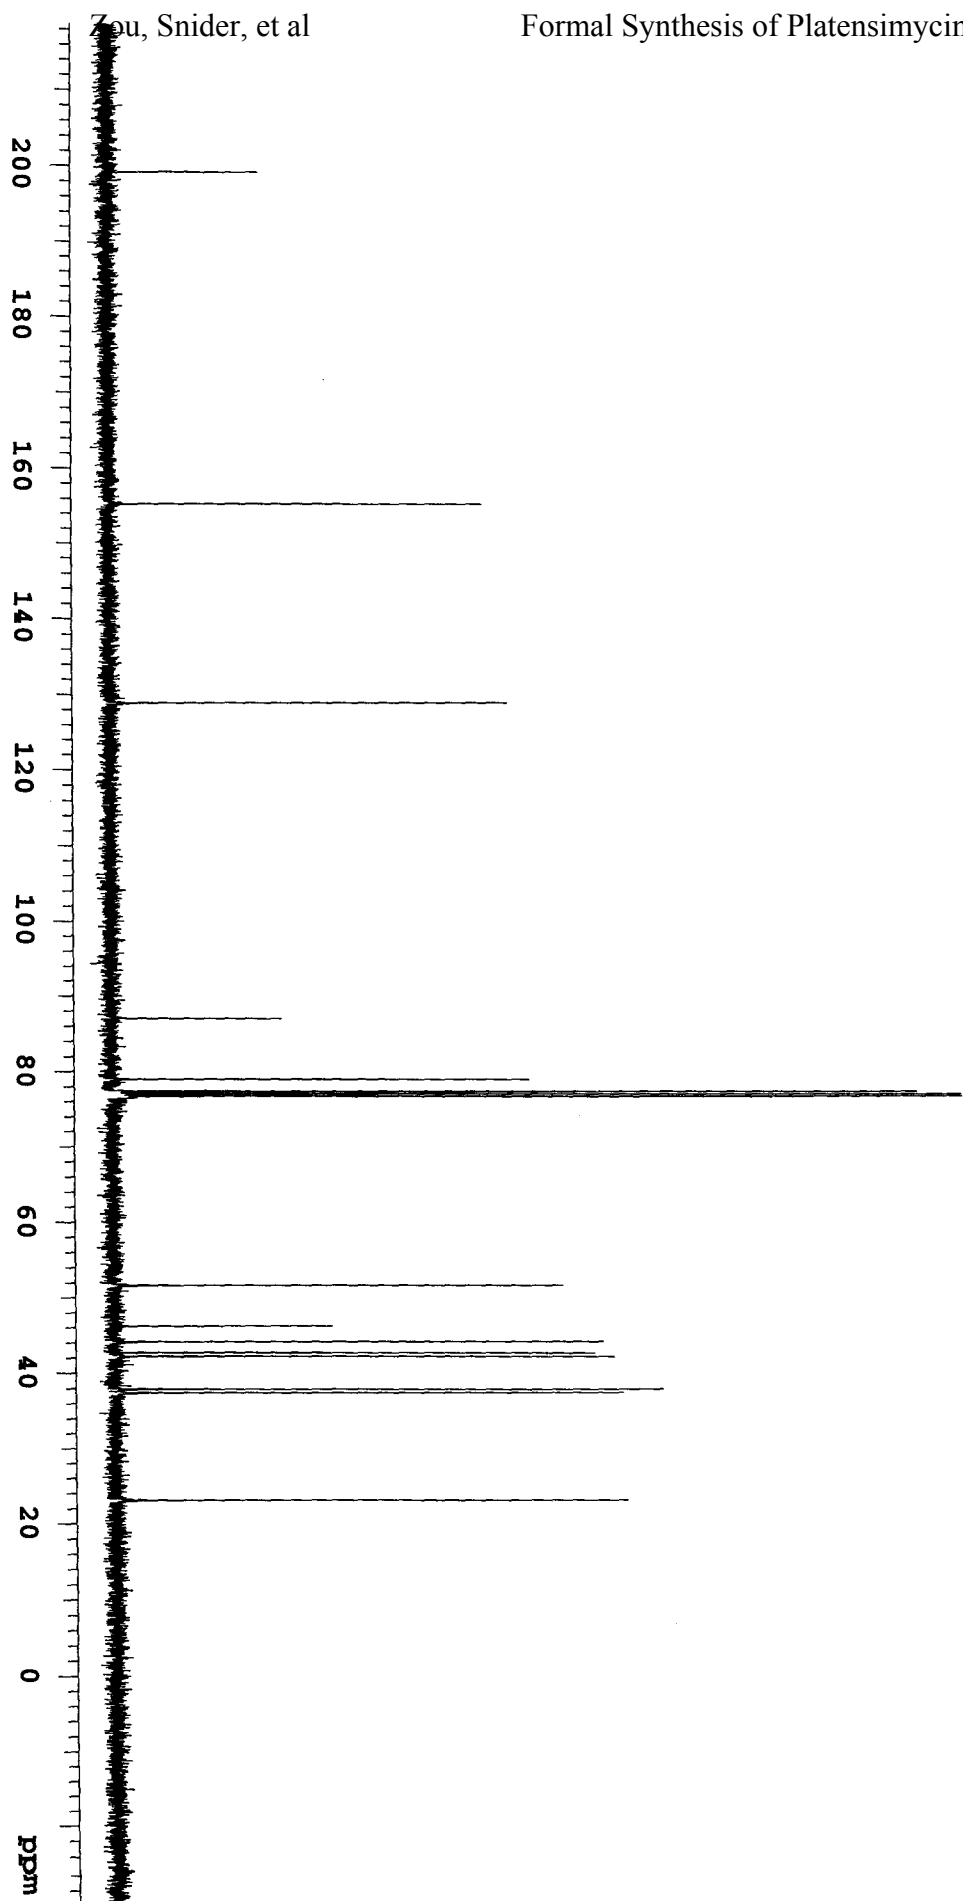

Supplement: NIHMS62241-supplement-si20070306_054.pdf [file NIHMS62241-supplement-si20070306_054.pdf]
